# Supplementary material for: Community dynamics during de novo colonization of the nascent peri-implant sulcus
Source: Int J Oral Sci. 2025 Apr 29;17:37. doi: 10.1038/s41368-025-00367-7 (PMC12041454; doi:10.1038/s41368-025-00367-7)
Supplement: Supplementary file 7 — Supplementary Table 1: [file 41368_2025_367_MOESM7_ESM.xlsx]

## Sheet: Sheet1
Supplementary Table 1. Figure 2 A - Cover Screw microbiome.
Taxon ID	Overall abundance
Streptococcus mitis	0.192371
Enterococcus casseliflavus	0.0720858
Cutibacterium acnes	0.0558313
Haemophilus parainfluenzae	0.0344588
Saccharibacteria (TM7) [G-1] bacterium HMT 348	0.0340711
Streptococcus parasanguinis	0.0253784
Cupriavidus gilardii	0.0241157
Rothia mucilaginosa	0.0219336
Streptococcus sanguinis	0.0211274
Streptococcus infantis	0.0153083
Fusobacterium nucleatum subsp. animalis	0.0148701
Streptococcus pneumoniae	0.0140894
Streptococcus oralis subsp. oralis	0.0134813
Streptococcus salivarius	0.0107861
Corynebacterium matruchotii	0.00976733
Prevotella nigrescens	0.00966169
Prevotella intermedia	0.00961014
Enterococcus aecalis	0.00946562
Enterococcus saccharolyticus	0.00900354
Fusobacterium nucleatum subsp. vincentii	0.00874324
Prevotella melaninogenica	0.00841784
Streptococcus cristatus	0.00839896
Neisseria lavescens	0.00792979
Aggregatibacter actinomycetemcomitans	0.00776285
Fusobacterium nucleatum subsp. polymorphum	0.00756411
Enterococcus italicus	0.00678714
Veillonella parvula	0.00657941
Enterococcus durans	0.00652684
Porphyromonas gingivalis	0.00638637
Alloprevotella tannerae	0.00572707
Streptococcus oralis	0.00544663
Prevotella denticola	0.00535113
Streptococcus intermedius	0.00527753
Neisseria mucosa	0.00523637
Streptococcus mutans	0.00503218
Gemella sanguinis	0.00493807
Porphyromonas pasteri	0.00492325
Neisseria meningitidis	0.00462913
Tannerella sp. HMT 286	0.00424267
Rothia dentocariosa	0.00421962
Veillonella dispar	0.00393741
Fusobacterium periodonticum	0.00391132
Haemophilus influenzae	0.00387243
Tannerella forsythia	0.00384811
Streptococcus vestibularis	0.00366698
Neisseria subflava	0.00339034
Staphylococcus aureus	0.00337881
Lactococcus lactis	0.00334588
Treponema denticola	0.00332815
Prevotella oris	0.00328331
Neisseria perflava	0.00327393
Pseudomonas stutzeri	0.00302605
Staphylococcus epidermidis	0.00290242
Ligilactobacillus salivarius	0.00280983
Streptococcus australis	0.00277525
Bacillus subtilis	0.00274194
Prevotella pleuritidis	0.00270609
Gemella haemolysans	0.00263478
Streptococcus gordonii	0.00255637
Escherichia coli	0.00252787
Rothia aeria	0.00250836
Ralstonia pickettii	0.00243566
Schaalia odontolytica	0.00241577
Listeria monocytogenes	0.00240159
Moraxella catarrhalis	0.00238981
Neisseria sicca	0.00234737
Veillonella atypica	0.00230443
Streptococcus sp. HMT 066	0.00225275
Bacteroidales [G-2] bacterium HMT 274	0.00221589
Bacillus anthracis	0.00220817
Haemophilus haemolyticus	0.00220411
Streptococcus sp. HMT 064	0.00219385
Rhodobacter capsulatus	0.00215547
Saccharibacteria (TM7) [G-1] bacterium HMT 488	0.00205237
Alkalihalobacillus clausii	0.00203197
Actinomyces oris	0.00202133
Veillonella rogosae	0.00200056
Streptococcus sp. HMT 061	0.00199777
Streptococcus agalactiae	0.00194407
Prevotella multiformis	0.00193533
Lactobacillus iners	0.00182741
Actinomyces sp. HMT 169	0.00177801
Campylobacter concisus	0.00175318
Selenomonas noxia	0.00171151
Capnocytophaga granulosa	0.0017091
Delftia acidovorans	0.0017072
Lacticaseibacillus rhamnosus	0.00169884
Stenotrophomonas maltophilia	0.00169555
Streptococcus anginosus	0.00159194
Methanobrevibacter oralis	0.00157154
Pseudomonas aeruginosa	0.00156597
Capnocytophaga ochracea	0.00153785
Fusobacterium hwasookii	0.00152556
Fusobacterium sp. HMT 203	0.00152404
Streptococcus constellatus	0.00143056
Actinomyces naeslundii	0.00140586
Fusobacterium nucleatum subsp. nucleatum	0.00139193
Actinomyces viscosus	0.00136926
Actinomyces sp. HMT 171	0.00135837
Granulicatella adiacens	0.00135419
Aerococcus viridans	0.00131315
Actinomyces sp. HMT 175	0.00130086
Campylobacter curvus	0.00127261
Gemella morbillorum	0.00125513
Anoxybacillus lavithermus	0.00123081
Fannyhessea vaginae	0.00120168
Neisseria elongata	0.00119269
Corynebacterium aurimucosum	0.00118699
Acinetobacter baumannii	0.00116875
Paenibacillus glucanolyticus	0.0011519
Paracoccus yeei	0.00115127
Prevotella aurantiaca	0.00113847
Actinomyces israelii	0.00109452
Neisseria macacae	0.00109389
Prevotella veroralis	0.00109389
Streptococcus peroris	0.00107869
Selenomonas sputigena	0.00107172
Saccharibacteria (TM7) [G-1] bacterium HMT 349	0.00105525
Prevotella jejuni	0.00105424
Neisseria lactamica	0.00103967
Streptococcus pyogenes	0.00100066
Prevotella enoeca	0.000997747
Arachnia propionica	0.000987487
Neisseria oralis	0.000987361
Pseudomonas oleovorans	0.000981661
Schlegelella thermodepolymerans	0.000962027
Pseudomonas luorescens	0.000922381
Actinomyces johnsonii	0.000905154
Haemophilus sp. HMT 036	0.000880835
Corynebacterium tuberculostearicum	0.000872475
Saccharibacteria (TM7) [G-8] bacterium HMT 955	0.000871841
Staphylococcus haemolyticus	0.000865635
Porphyromonas sp. HMT 278	0.000838275
Streptococcus lactarius	0.000811802
Capnocytophaga leadbetteri	0.000806482
Haematobacter missouriensis	0.000798755
Ottowia sp. HMT 894	0.000791789
Fusobacterium nucleatum	0.000791029
Brevundimonas diminuta	0.000789762
Selenomonas artemidis	0.000785835
Leptotrichia wadei	0.000783049
Eikenella corrodens	0.000768735
Leptotrichia buccalis	0.000768229
Prevotella pallens	0.000764302
Porphyromonas endodontalis	0.000762022
Actinomyces dentalis	0.000758095
Prevotella histicola	0.000753409
Lactiplantibacillus plantarum	0.000745429
Prevotella salivae	0.000741502
Lactobacillus gasseri	0.000734282
Bifidobacterium subtile	0.000727949
Achromobacter xylosoxidans	0.000727189
Solobacterium moorei	0.000719336
Treponema socranskii	0.000717056
Leptotrichia hofstadii	0.000710089
Capnocytophaga gingivalis	0.000700082
Neisseria gonorrhoeae	0.000698056
Prevotella oulorum	0.000681083
Prevotella bivia	0.000676776
Streptococcus thermophilus	0.000666896
Prevotella maculosa	0.000660183
Limosilactobacillus fermentum	0.000650049
Haemophilus sputorum	0.000649036
Prevotella scopos	0.000647516
Prevotella micans	0.000637383
Prevotella marshii	0.000631429
Capnocytophaga sp. HMT 323	0.000627883
Lacticaseibacillus casei	0.000625983
Dialister invisus	0.000621296
Actinomyces massiliensis	0.000615343
Capnocytophaga sp. HMT 335	0.00060939
Capnocytophaga sp. HMT 902	0.00060787
Levilactobacillus brevis	0.000603056
Neisseria cinerea	0.00060255
Neisseria weaveri	0.000589123
Leptotrichia sp. HMT 417	0.000585703
Corynebacterium accolens	0.000584816
Capnocytophaga sp. HMT 336	0.000581143
Leptotrichia sp. HMT 215	0.000569617
Limosilactobacillus reuteri	0.000569237
Capnocytophaga sp. HMT 412	0.000559103
Actinomyces sp. HMT 897	0.00054935
Lachnoanaerobaculum saburreum	0.000541877
Capnocytophaga sp. HMT 864	0.00053301
Campylobacter gracilis	0.00053111
Capnocytophaga sp. HMT 380	0.00053111
Prevotella buccae	0.000522117
Prevotella loescheii	0.00051325
Sneathia sanguinegens	0.000510717
Comamonas testosteroni	0.000506537
Desulfobulbus sp. HMT 041	0.00049843
Prevotella sp. HMT 472	0.000495897
Mogibacterium timidum	0.00049121
Capnocytophaga sp. HMT 324	0.000484117
Capnocytophaga endodontalis	0.000479557
Capnocytophaga sp. HMT 903	0.000475757
Tannerella sp. HMT 808	0.000460937
Acinetobacter johnsonii	0.000460684
Aggregatibacter sp. HMT 458	0.000453971
Campylobacter showae	0.000444977
Leptotrichia sp. HMT 879	0.000444851
Lancefieldella rimae	0.000439911
Prevotella sp. HMT 317	0.000436744
Peptostreptococcaceae [G-1] [Eubacterium] infirmum	0.000436364
Haemophilus pittmaniae	0.000429524
Stenotrophomonas nitritireducens	0.000427244
Prevotella sp. HMT 306	0.000423064
Streptococcus sp. HMT 056	0.000422177
Selenomonas sp. HMT 136	0.000419391
Absconditabacteria (SR1) [G-1] bacterium HMT 874	0.000417997
Bifidobacterium longum	0.000417744
Actinomyces graevenitzii	0.000417111
Helicobacter pylori	0.000415211
Aggregatibacter aphrophilus	0.000412931
Anaerococcus octavius	0.000411537
Microbacterium lavescens	0.000405838
Prevotella usca	0.000405458
Lacticaseibacillus paracasei	0.000400138
Finegoldia magna	0.000399124
Kingella oralis	0.000396591
Lentilactobacillus buchneri	0.000387218
Prevotella nanceiensis	0.000386838
Abiotrophia defectiva	0.000384304
Leptotrichia hongkongensis	0.000379871
Leptotrichia sp. HMT 212	0.000375184
Prevotella baroniae	0.000374171
Corynebacterium amycolatum	0.000371258
Oribacterium sinus	0.000367458
Capnocytophaga sputigena	0.000366698
Microbacterium ginsengisoli	0.000364418
Schaalia sp. HMT 172	0.000358211
Dialister pneumosintes	0.000358084
Granulicatella elegans	0.000357958
Peptostreptococcaceae [G-9] [Eubacterium] brachy	0.000357704
Parvimonas micra	0.000354918
Neisseria polysaccharea	0.000353018
Prevotella shahii	0.000349345
Schaalia sp. HMT 877	0.000349345
Saccharibacteria (TM7) [G-1] bacterium HMT 952	0.000348711
Schaalia sp. HMT 178	0.000348458
Prevotella sp. HMT 376	0.000337311
Variovorax paradoxus	0.000336171
Prevotella oralis	0.000335411
Dolosigranulum pigrum	0.000326798
Streptococcus sobrinus	0.000326545
Schaalia lingnae	0.000325658
Schaalia sp. HMT 180	0.000317678
Selenomonas sp. HMT 137	0.000317171
Acinetobacter lwoffii	0.000314638
Actinomyces sp. HMT 170	0.000311725
Micrococcus luteus	0.000311471
Corynebacterium simulans	0.000305265
Parvimonas sp. HMT 110	0.000304885
Lautropia mirabilis	0.000299565
Staphylococcus cohnii	0.000298932
Peptidiphaga sp. HMT 183	0.000297158
Yersinia pestis	0.000297032
Leptotrichia sp. HMT 225	0.000296905
Cardiobacterium hominis	0.000295892
Johnsonella ignava	0.000295005
Fusobacterium sp. HMT 370	0.000293105
Agrobacterium tumefaciens	0.000291332
Aggregatibacter sp. HMT 513	0.000290572
Lysinibacillus usiformis	0.000288165
Peptostreptococcus stomatis	0.000287532
Actinomyces sp. HMT 414	0.000287152
Olsenella sp. HMT 807	0.000286392
Prevotella saccharolytica	0.000283478
Streptococcus sinensis	0.000283352
Schaalia georgiae	0.000278158
Prevotella sp. HMT 314	0.000278032
Porphyromonas catoniae	0.000275625
Lactobacillus johnsonii	0.000275372
Oribacterium sp. HMT 078	0.000274232
Treponema maltophilum	0.000274232
Corynebacterium diphtheriae	0.000272205
Mycoplasma salivarium	0.000268532
Staphylococcus warneri	0.000267265
Lactobacillus jensenii	0.000266252
Lachnoanaerobaculum sp. HMT 083	0.000262452
Campylobacter rectus	0.000261185
Lancefieldella parvula	0.000258778
Kocuria palustris	0.000258398
Gemella sp. HMT 928	0.000257892
Klebsiella pneumoniae	0.000257892
Peptostreptococcaceae [G-1] [Eubacterium] sulci	0.000255485
Bifidobacterium dentium	0.000252572
Acidovorax ebreus	0.000250925
Olsenella profusa	0.000250545
Lachnospiraceae [G-2] bacterium HMT 096	0.000249785
Lachnospiraceae [G-2] bacterium HMT 096	0.000248772
Gardnerella vaginalis	0.000242819
Capnocytophaga sp. HMT 878	0.000240665
Burkholderia cepacia	0.000236992
Cardiobacterium valvarum	0.000235979
Leptotrichia sp. HMT 218	0.000233572
Selenomonas infelix	0.000233065
Capnocytophaga sp. HMT 863	0.000222299
Cutibacterium sp. HMT 193	0.000222299
Filifactor alocis	0.000221539
Aggregatibacter segnis	0.000219259
Schaalia meyeri	0.000218499
Pseudoleptotrichia sp. HMT 221	0.000216725
Sneathia vaginalis	0.000213432
Bifidobacterium animalis	0.000209759
Leptotrichia sp. HMT 223	0.000206719
Peptoniphilus lacrimalis	0.000206719
Selenomonas sp. HMT 478	0.000206339
Cellulosimicrobium cellulans	0.000205579
Alloprevotella rava	0.000205072
Catonella morbi	0.000204312
Anaerolineae [G-1] bacterium HMT 439	0.000200512
Megasphaera micronuciformis	0.000200005
Selenomonas sp. HMT 149	0.000199752
Corynebacterium coyleae	0.000199119
Acidipropionibacterium acidifaciens	0.000195445
Moraxella osloensis	0.000192659
Lactobacillus acidophilus	0.000190759
Limosilactobacillus oris	0.000189746
Leptotrichia shahii	0.000188099
Capnocytophaga sp. HMT 338	0.000187592
Corynebacterium durum	0.000187339
Acidovorax temperans	0.000187212
Alloprevotella sp. HMT 473	0.000186072
Olsenella uli	0.000186072
Bordetella pertussis	0.000185566
Prevotella buccalis	0.000184172
Sanguibacter keddieii	0.000184172
Corynebacterium urealyticum	0.000183792
Fretibacterium astidiosum	0.000181006
Peptidiphaga gingivicola	0.000179232
Mogibacterium diversum	0.000178219
Cutibacterium granulosum	0.000176572
Prevotella sp. HMT 475	0.000176446
Veillonella sp. HMT 780	0.000175812
Leptotrichia sp. HMT 498	0.000173152
Bradyrhizobium elkanii	0.000169479
Acidovorax caeni	0.000168719
Dialister micraerophilus	0.000168466
Actinomyces gerencseriae	0.000167959
Corynebacterium gottingense	0.000167959
Peptostreptococcus anaerobius	0.000167452
Saccharibacteria (TM7) [G-1] bacterium HMT 957	0.000166312
Peptoniphilus harei	0.000165806
Selenomonas sp. HMT 138	0.000164412
Mycoplasma genitalium	0.000163272
Aggregatibacter paraphrophilus	0.000162132
Selenomonas sp. HMT 920	0.000161372
Parascardovia denticolens	0.000158332
Brochothrix thermosphacta	0.000154786
Stomatobaculum longum	0.000151746
Porphyromonas sp. HMT 275	0.000151619
Erythrobacter ramosus	0.000151112
Mesorhizobium japonicum	0.000145412
Anaerococcus prevotii	0.000143766
Selenomonas lueggei	0.000141486
Actinomyces radicidentis	0.000141106
Parvimonas sp. HMT 393	0.000139206
Campylobacter ureolyticus	0.000136672
Treponema medium	0.000136672
Veillonella denticariosi	0.000136419
Oribacterium asaccharolyticum	0.000135913
Lachnoanaerobaculum orale	0.000135659
Brucella anthropi	0.000135406
Treponema lecithinolyticum	0.000135279
Enhydrobacter aerosaccus	0.000134773
Peptostreptococcaceae [G-6] [Eubacterium] nodatum	0.000133379
Kingella denitrificans	0.000131226
Selenomonas sp. HMT 126	0.000130466
Erysipelothrix tonsillarum	0.000129833
Eggerthia catenaformis	0.000129706
Acinetobacter junii	0.000128566
Anaeroglobus geminatus	0.000128186
Cutibacterium avidum	0.000127933
Leptotrichia sp. HMT 847	0.000126539
Prevotella sp. HMT 820	0.000125906
Lactobacillus crispatus	0.000125653
Bulleidia extructa	0.000124006
Limosilactobacillus panis	0.000123119
Janibacter indicus	0.000119953
Pseudoleptotrichia goodfellowii	0.000119826
Shuttleworthia satelles	0.000117673
Centipeda periodontii	0.000117293
Mycobacterium tuberculosis	0.000117166
Neisseria sp. HMT 020	0.000116533
Kytococcus sedentarius	0.000116279
Neisseria bacilliformis	0.000115519
Lachnospiraceae [G-8] bacterium HMT 500	0.000109946
Treponema pallidum	0.000109946
Paenibacillus phoenicis	0.000109059
Prevotella dentalis	0.000108553
Fusobacterium naviforme	0.000107286
Oribacterium parvum	0.000106906
Mycoplasma hominis	0.000106779
Cronobacter sakazakii	0.000106653
Alloiococcus otitis	0.000106146
Kocuria rhizophila	0.000104753
Staphylococcus capitis	0.000103993
Porphyromonas uenonis	0.000103866
Selenomonas sp. HMT 892	0.000103866
Peptostreptococcaceae [G-7] bacterium HMT 081	0.000101839
Lachnoanaerobaculum umeaense	0.000100066
Dietzia cinnamea	9.90527e-05
Staphylococcus caprae	9.90527e-05
Fusobacterium sp. HMT 248	9.75327e-05
Afipia broomeae	9.71527e-05
Proteus mirabilis	9.68994e-05
Haemophilus paraphrohaemolyticus	9.62661e-05
Corynebacterium striatum	9.57594e-05
Arsenicicoccus bolidensis	9.49994e-05
Erythrobacter tepidarius	9.49994e-05
Actinomyces timonensis	9.29728e-05
Capnocytophaga sp. HMT 332	9.23394e-05
Oribacterium sp. HMT 102	9.15794e-05
Phocaeicola abscessus	9.09461e-05
Haemophilus parahaemolyticus	9.03128e-05
Treponema vincentii	9.00595e-05
Bifidobacterium breve	8.84128e-05
Bosea vestrisii	8.81595e-05
Haemophilus ducreyi	8.76528e-05
Gemella bergeri	8.71461e-05
Fusobacterium necrophorum	8.39795e-05
Corynebacterium pilbarense	8.34728e-05
Dermabacter hominis	8.34728e-05
Actinomyces oricola	8.28395e-05
Roseomonas mucosa	8.23328e-05
Actinomyces sp. HMT 448	8.15728e-05
Roseomonas gilardii	8.03062e-05
Corynebacterium otitidis	8.01795e-05
Staphylococcus pettenkoferi	7.99262e-05
Bacteroides pyogenes	7.94195e-05
Lactiplantibacillus pentosus	7.92928e-05
Peptoniphilus sp. HMT 375	7.89129e-05
Enterobacter cancerogenus	7.87862e-05
Staphylococcus hominis	7.85329e-05
Slackia exigua	7.78995e-05
Bacteroides zoogleoformans	7.68862e-05
Gracilibacteria (GN02) [G-3] bacterium HMT 996	7.14396e-05
Pseudomonas otitidis	7.14396e-05
Streptococcus downei	7.14396e-05
Simonsiella muelleri	7.04262e-05
Staphylococcus schleiferi	7.01729e-05
Haemophilus aegyptius	6.78929e-05
Novosphingobium panipatense	6.73863e-05
Porphyromonas asaccharolytica	6.47263e-05
Mogibacterium pumilum	6.39663e-05
Capnocytophaga haemolytica	6.32063e-05
Peptoniphilus indolicus	6.23196e-05
Treponema pectinovorum	6.15596e-05
Sphingomonas glacialis	6.07996e-05
Kingella kingae	6.04196e-05
Corynebacterium pseudodiphtheriticum	5.8393e-05
Staphylococcus lugdunensis	5.6113e-05
Limosilactobacillus vaginalis	5.50997e-05
Klebsiella aerogenes	5.4973e-05
Acinetobacter radioresistens	5.3073e-05
Peptostreptococcaceae [G-7] [Eubacterium] yurii subsps. yurii &#38; margaretiae	5.2693e-05
Anaerococcus lactolyticus	5.2313e-05
Corynebacterium singulare	5.21863e-05
Arachnia rubra	5.1933e-05
Corynebacterium jeikeium	5.1933e-05
Serratia marcescens	5.16797e-05
Selenomonas sp. HMT 133	5.09197e-05
Peptoniphilus sp. HMT 386	5.06664e-05
Pseudoramibacter alactolyticus	5.02864e-05
Propionibacteriaceae [G-2] bacterium HMT 192	4.9273e-05
Mobiluncus mulieris	4.83864e-05
Peptostreptococcaceae [G-5] [Eubacterium] saphenum	4.78797e-05
Peptoniphilaceae [G-3] bacterium HMT 929	4.68664e-05
Mycoplasmopsis ermentans	4.62331e-05
Staphylococcus pasteuri	4.53464e-05
Prevotella multisaccharivorax	4.42064e-05
Bacteroides heparinolyticus	4.35731e-05
Candidatus Saccharimonas aalborgensis	4.29397e-05
Mitsuokella multacida	4.28131e-05
Peptoniphilaceae [G-1] bacterium HMT 113	4.28131e-05
Mycoplasma pneumoniae	4.25597e-05
Peptoniphilus sp. HMT 187	4.21797e-05
Lancefieldella sp. HMT 199	4.20531e-05
Bartonella schoenbuchensis	4.14197e-05
Corynebacterium afermentans	4.04064e-05
Fusobacterium gonidiaformans	4.02798e-05
Arcanobacterium haemolyticum	3.91398e-05
Corynebacterium bovis	3.91398e-05
Brevibacterium paucivorans	3.85064e-05
Pseudomonas luteola	3.83798e-05
Anaerococcus tetradius	3.82531e-05
Corynebacterium mucifaciens	3.79998e-05
Desulfovibrio fairfieldensis	3.79998e-05
Corynebacterium appendicis	3.78731e-05
Eubacterium limosum	3.78731e-05
Peptoniphilus asaccharolyticus	3.77464e-05
Gracilibacteria (GN02) [G-4] bacterium HMT 997	3.64798e-05
Corynebacterium macginleyi	3.62264e-05
Lentilactobacillus rapi	3.58464e-05
Chlamydia pneumoniae	3.52131e-05
Corynebacterium mastitidis	3.38198e-05
Treponema putidum	3.34398e-05
Campylobacter sputorum	3.31865e-05
Olegusella massiliensis	3.31865e-05
Schaalia cardiffensis	3.24265e-05
Mycoplasma orale	3.19198e-05
Bifidobacterium scardovii	3.09065e-05
Cryptobacterium curtum	3.06531e-05
Olsenella sp. HMT 809	3.06531e-05
Mycolicibacterium neoaurum	3.01465e-05
Lentilactobacillus parafarraginis	2.97665e-05
Corynebacterium minutissimum	2.95132e-05
Corynebacterium propinquum	2.78665e-05
Lentilactobacillus kisonensis	2.78665e-05
Corynebacterium massiliense	2.74865e-05
Moraxella nonliquefaciens	2.74865e-05
Mitsuokella sp. HMT 131	2.68532e-05
Peptostreptococcaceae [G-6] [Eubacterium] minutum	2.68532e-05
Pyramidobacter piscolens	2.64732e-05
Eggerthella lenta	2.57132e-05
Jonquetella anthropi	2.55865e-05
Moraxella lincolnii	2.48265e-05
Absconditabacteria (SR1) [G-1] bacterium HMT 991	2.45732e-05
Fastidiosipila sanguinis	2.44465e-05
Scardovia wiggsiae	2.44465e-05
Lactobacillus ultunensis	2.36865e-05
Victivallales [G-1] bacterium HMT 998	2.31799e-05
Staphylococcus auricularis	2.26732e-05
Micavibrio aeruginosavorus	2.22932e-05
Corynebacterium kroppenstedtii	2.15332e-05
Lawsonella clevelandensis	2.12799e-05
Desulfomicrobium orale	2.07732e-05
Clostridiales [F-3][G-1] bacterium HMT 876	2.00132e-05
Enterobacter hormaechei	1.92532e-05
Saccharibacteria (TM7) [G-7] bacterium HMT 986	1.91265e-05
Saccharibacteria (TM7) [G-7] bacterium HMT 987	1.87466e-05
Ignavibacterium album	1.81132e-05
Kluyvera ascorbata	1.78599e-05
Mycobacterium leprae	1.77332e-05
Alloscardovia omnicolens	1.74799e-05
Fannyhessea sp. HMT 416	1.64666e-05
Limosilactobacillus coleohominis	1.57066e-05
Arthrospira platensis	1.49466e-05
Segetibacter aerophilus	1.45666e-05
Melioribacter roseus	1.40599e-05
Atopobium minutum	1.30466e-05
Saccharibacteria (TM7) [G-7] bacterium HMT 989	1.30466e-05
Chlorobium limicola	1.16533e-05
Caldilinea aerophila	1.11466e-05
Corynebacterium tuscaniense	9.37328e-06
Anaerolinea thermophila	7.97995e-06
Scardovia inopinata	7.34662e-06
