# Supplementary material for: Community dynamics during de novo colonization of the nascent peri-implant sulcus
Source: Int J Oral Sci. 2025 Apr 29;17:37. doi: 10.1038/s41368-025-00367-7 (PMC12041454; doi:10.1038/s41368-025-00367-7)
Supplement: Supplementary file 8 — Supplementary Table 2: [file 41368_2025_367_MOESM8_ESM.xlsx]

## Sheet: SparCC
Supplementary Table 2. Figure 3 A-F - Sparse Co-occurrence Network Investigation for Compositional data. Species colored in blue are pioneers.
Uncovery		24 Hours		1 Week		3 Weeks		6 Weeks		12 Weeks
Species	Module	Species	Module	Species	Module	Species	Module	Species	Module	Species	Module
Capnocytophaga sp. HMT 902	module_0	Capnocytophaga sp. HMT 864	module_0	Capnocytophaga sp. HMT 336	module_0	Neisseria sicca	module_0	Neisseria lactamica	module_0	Capnocytophaga sp. HMT 903	module_0
Capnocytophaga sp. HMT 336	module_0	Capnocytophaga sp. HMT 335	module_0	Capnocytophaga granulosa	module_0	Neisseria perflava	module_0	Neisseria gonorrhoeae	module_0	Capnocytophaga sp. HMT 864	module_0
Capnocytophaga sp. HMT 335	module_0	Capnocytophaga sp. HMT 412	module_0	Capnocytophaga sp. HMT 338	module_0	Neisseria meningitidis	module_0	Neisseria cinerea	module_0	Capnocytophaga sp. HMT 336	module_0
Capnocytophaga sp. HMT 323	module_0	Capnocytophaga sp. HMT 336	module_0	Capnocytophaga sp. HMT 380	module_0	Neisseria macacae	module_0	Neisseria macacae	module_0	Capnocytophaga sp. HMT 902	module_0
Capnocytophaga ochracea	module_0	Capnocytophaga sp. HMT 903	module_0	Capnocytophaga ochracea	module_0	Neisseria gonorrhoeae	module_0	Kingella denitrificans	module_0	Capnocytophaga sp. HMT 324	module_0
Capnocytophaga sp. HMT 412	module_0	Capnocytophaga ochracea	module_0	Capnocytophaga sp. HMT 332	module_0	Neisseria mucosa	module_0	Neisseria meningitidis	module_0	Capnocytophaga sp. HMT 412	module_0
Capnocytophaga sp. HMT 864	module_0	Capnocytophaga sp. HMT 324	module_0	Capnocytophaga sp. HMT 903	module_0	Neisseria cinerea	module_0	Neisseria flavescens	module_0	Capnocytophaga sp. HMT 335	module_0
Capnocytophaga sp. HMT 380	module_0	Capnocytophaga sp. HMT 380	module_0	Capnocytophaga sp. HMT 324	module_0	Neisseria subflava	module_0	Neisseria oralis	module_0	Capnocytophaga sp. HMT 323	module_0
Capnocytophaga sp. HMT 324	module_0	Capnocytophaga sp. HMT 902	module_0	Capnocytophaga sp. HMT 412	module_0	Neisseria oralis	module_0	Neisseria mucosa	module_0	Capnocytophaga ochracea	module_0
Capnocytophaga sp. HMT 903	module_0	Capnocytophaga sp. HMT 323	module_0	Capnocytophaga sp. HMT 878	module_0	Neisseria polysaccharea	module_0	Neisseria sicca	module_0	Capnocytophaga sp. HMT 380	module_0
Actinomyces sp. HMT 169	module_1	Desulfovibrio fairfieldensis	module_1	Capnocytophaga sp. HMT 864	module_0	Neisseria flavescens	module_0	Neisseria polysaccharea	module_0	Prevotella buccae	module_1
Actinomyces sp. HMT 170	module_1	Prevotella sp. HMT 475	module_1	Capnocytophaga sp. HMT 863	module_0	Neisseria lactamica	module_0	Neisseria sp. HMT 020	module_0	Prevotella sp. HMT 376	module_1
Actinomyces viscosus	module_1	Saccharibacteria (TM7) [G-1] bacterium HMT 348	module_1	Capnocytophaga sp. HMT 323	module_0	Capnocytophaga ochracea	module_1	Capnocytophaga sp. HMT 324	module_1	Prevotella baroniae	module_1
Actinomyces sp. HMT 171	module_1	Porphyromonas gingivalis	module_1	Capnocytophaga sp. HMT 902	module_0	Capnocytophaga sp. HMT 380	module_1	Capnocytophaga sp. HMT 902	module_1	Prevotella dentalis	module_1
Actinomyces sp. HMT 175	module_1	Corynebacterium aurimucosum	module_1	Capnocytophaga sp. HMT 335	module_0	Capnocytophaga sp. HMT 412	module_1	Capnocytophaga sp. HMT 323	module_1	Prevotella sp. HMT 820	module_1
Actinomyces oris	module_1	Lacticaseibacillus rhamnosus	module_1	Neisseria oralis	module_1	Capnocytophaga sp. HMT 335	module_1	Capnocytophaga haemolytica	module_1	Prevotella oralis	module_1
Alkalihalobacillus clausii	module_2	Corynebacterium simulans	module_1	Neisseria mucosa	module_1	Capnocytophaga sp. HMT 864	module_1	Capnocytophaga sp. HMT 336	module_1	Prevotella veroralis	module_1
Levilactobacillus brevis	module_2	Fannyhessea vaginae	module_1	Neisseria cinerea	module_1	Capnocytophaga sp. HMT 324	module_1	Capnocytophaga sp. HMT 412	module_1	Alloprevotella rava	module_1
Lysinibacillus fusiformis	module_2	Leptotrichia sp. HMT 879	module_1	Neisseria meningitidis	module_1	Capnocytophaga sp. HMT 903	module_1	Capnocytophaga sp. HMT 380	module_1	Capnocytophaga haemolytica	module_2
Bacillus subtilis	module_2	Dialister micraerophilus	module_2	Neisseria polysaccharea	module_1	Capnocytophaga sp. HMT 902	module_1	Capnocytophaga ochracea	module_1	Capnocytophaga granulosa	module_2
Anoxybacillus flavithermus	module_2	Peptoniphilus sp. HMT 375	module_2	Neisseria weaveri	module_1	Capnocytophaga sp. HMT 323	module_1	Capnocytophaga sp. HMT 903	module_1	Capnocytophaga sputigena	module_2
Pseudomonas aeruginosa	module_3	Peptoniphilus harei	module_2	Neisseria lactamica	module_1	Capnocytophaga sp. HMT 336	module_1	Capnocytophaga sp. HMT 864	module_1	Capnocytophaga endodontalis	module_2
Pseudomonas fluorescens	module_3	Leptotrichia sp. HMT 223	module_2	Neisseria gonorrhoeae	module_1	Capnocytophaga endodontalis	module_1	Capnocytophaga sp. HMT 335	module_1	Cardiobacterium valvarum	module_2
Achromobacter xylosoxidans	module_3	Finegoldia magna	module_2	Neisseria sp. HMT 020	module_1	Actinomyces sp. HMT 171	module_2	Actinomyces sp. HMT 169	module_2	Capnocytophaga sp. HMT 878	module_2
Rhodobacter capsulatus	module_3	Anaerococcus lactolyticus	module_2	Prevotella salivae	module_2	Actinomyces viscosus	module_2	Actinomyces naeslundii	module_2	Capnocytophaga sp. HMT 863	module_2
Brevundimonas diminuta	module_3	Peptoniphilus lacrimalis	module_2	Prevotella melaninogenica	module_2	Actinomyces naeslundii	module_2	Actinomyces oris	module_2	Neisseria gonorrhoeae	module_3
Streptococcus constellatus	module_4	Lactobacillus iners	module_2	Prevotella sp. HMT 314	module_2	Actinomyces oris	module_2	Actinomyces sp. HMT 170	module_2	Neisseria polysaccharea	module_3
Prevotella sp. HMT 472	module_4	Neisseria sp. HMT 020	module_3	Prevotella fusca	module_2	Actinomyces massiliensis	module_2	Actinomyces sp. HMT 175	module_2	Neisseria mucosa	module_3
Streptococcus anginosus	module_4	Neisseria mucosa	module_3	Prevotella scopos	module_2	Actinomyces sp. HMT 169	module_2	Actinomyces sp. HMT 171	module_2	Neisseria meningitidis	module_3
Prevotella loescheii	module_4	Neisseria sicca	module_3	Prevotella sp. HMT 306	module_2	Actinomyces sp. HMT 175	module_2	Actinomyces viscosus	module_2	Neisseria cinerea	module_3
Streptococcus intermedius	module_4	Neisseria cinerea	module_3	Prevotella jejuni	module_2	Actinomyces sp. HMT 170	module_2	Prevotella nanceiensis	module_3	Neisseria lactamica	module_3
Prevotella sp. HMT 376	module_5	Neisseria macacae	module_3	Actinomyces sp. HMT 175	module_3	Leptotrichia sp. HMT 879	module_3	Prevotella aurantiaca	module_3	Prevotella multisaccharivorax	module_4
Streptococcus oralis subsp. oralis	module_5	Neisseria polysaccharea	module_3	Actinomyces oris	module_3	Porphyromonas sp. HMT 278	module_3	Prevotella shahii	module_3	Prevotella enoeca	module_4
Streptococcus sp._HMT_064	module_5	Neisseria gonorrhoeae	module_3	Actinomyces sp. HMT 169	module_3	Corynebacterium aurimucosum	module_3	Prevotella fusca	module_3	Prevotella maculosa	module_4
Streptococcus gordonii	module_5	Neisseria oralis	module_3	Actinomyces sp. HMT 170	module_3	Absconditabacteria (SR1) [G-1] bacterium HMT 991	module_3	Prevotella bivia	module_3	Prevotella nigrescens	module_4
Campylobacter rectus	module_5	Methanobrevibacter oralis	module_4	Actinomyces viscosus	module_3	Corynebacterium simulans	module_3	Prevotella sp. HMT 314	module_3	Prevotella marshii	module_4
Prevotella sp. HMT 314	module_6	Aggregatibacter actinomycetemcomitans	module_4	Actinomyces sp. HMT 171	module_3	Fannyhessea vaginae	module_3	Melioribacter roseus	module_4	Prevotella oris	module_4
Prevotella bivia	module_6	Limosilactobacillus panis	module_4	Lacticaseibacillus rhamnosus	module_4	Saccharibacteria (TM7) [G-1] bacterium HMT 348	module_3	Ignavibacterium album	module_4	Actinomyces sp. HMT 170	module_5
Prevotella salivae	module_6	Sneathia sanguinegens	module_4	Fannyhessea vaginae	module_4	Veillonella dispar	module_4	Saccharibacteria (TM7) [G-1] bacterium HMT 348	module_4	Actinomyces sp. HMT 171	module_5
Prevotella maculosa	module_6	Sneathia vaginalis	module_4	Desulfovibrio fairfieldensis	module_4	Veillonella denticariosi	module_4	Fannyhessea vaginae	module_4	Actinomyces oris	module_5
Enterococcus saccharolyticus	module_7	Helicobacter pylori	module_4	Segetibacter aerophilus	module_4	Veillonella atypica	module_4	Lacticaseibacillus rhamnosus	module_4	Actinomyces sp. HMT 169	module_5
Enterococcus durans	module_7	Lactobacillus jensenii	module_4	Saccharibacteria (TM7) [G-1] bacterium HMT 348	module_4	Veillonella sp. HMT 780	module_4	Corynebacterium simulans	module_4	Actinomyces sp. HMT 175	module_5
Enterococcus italicus	module_7	Actinomyces viscosus	module_5	Corynebacterium simulans	module_4	Veillonella parvula	module_4	Streptococcus thermophilus	module_5	Actinomyces viscosus	module_5
Staphylococcus haemolyticus	module_7	Actinomyces sp. HMT 170	module_5	Fusobacterium nucleatum	module_5	Veillonella rogosae	module_4	Streptococcus parasanguinis	module_5	Prevotella bivia	module_6
Paenibacillus glucanolyticus	module_8	Actinomyces sp. HMT 169	module_5	Fusobacterium nucleatum subsp. nucleatum	module_5	Prevotella marshii	module_5	Streptococcus salivarius	module_5	Prevotella sp. HMT 306	module_6
Haematobacter missouriensis	module_8	Actinomyces oris	module_5	Fusobacterium sp. HMT 203	module_5	Prevotella intermedia	module_5	Streptococcus vestibularis	module_5	Prevotella fusca	module_6
Enterococcus casseliflavus	module_8	Actinomyces sp. HMT 175	module_5	Fusobacterium nucleatum subsp. polymorphum	module_5	Prevotella sp. HMT 376	module_5	Streptococcus sp. HMT 066	module_5	Prevotella sp. HMT 314	module_6
Paracoccus yeei	module_8	Actinomyces sp. HMT 171	module_5	Fusobacterium hwasookii	module_5	Prevotella sp. HMT 820	module_5	Streptococcus lactarius	module_5	Prevotella buccalis	module_6
Veillonella parvula	module_9	Prevotella bivia	module_6	Fusobacterium sp. HMT 370	module_5	Lachnospiraceae [G-8] bacterium HMT 500	module_5	Fusobacterium sp. HMT 248	module_6	Prevotella aurantiaca	module_6
Veillonella denticariosi	module_9	Prevotella melaninogenica	module_6	Veillonella dispar	module_6	Methanobrevibacter oralis	module_6	Fusobacterium nucleatum subsp. nucleatum	module_6	Streptococcus oralis subsp. oralis	module_7
Streptococcus vestibularis	module_9	Prevotella pallens	module_6	Veillonella parvula	module_6	Lactobacillus jensenii	module_6	Fusobacterium sp. HMT 203	module_6	Streptococcus sp._HMT_064	module_7
Veillonella dispar	module_9	Prevotella scopos	module_6	Veillonella denticariosi	module_6	Limosilactobacillus panis	module_6	Fusobacterium nucleatum	module_6	Streptococcus mitis	module_7
Methanobrevibacter oralis	module_10	Prevotella jejuni	module_6	Veillonella rogosae	module_6	Sneathia sanguinegens	module_6	Fusobacterium sp. HMT 370	module_6	Streptococcus oralis	module_7
Sneathia vaginalis	module_10	Prevotella fusca	module_6	Veillonella sp. HMT 780	module_6	Sneathia vaginalis	module_6	Prevotella intermedia	module_7	Streptococcus pneumoniae	module_7
Sneathia sanguinegens	module_10	Parvimonas micra	module_7	Methanobrevibacter oralis	module_7	Selenomonas sp. HMT 149	module_7	Alloprevotella rava	module_7	Leptotrichia sp. HMT 847	module_8
Helicobacter pylori	module_10	Fusobacterium hwasookii	module_7	Limosilactobacillus panis	module_7	Selenomonas flueggei	module_7	Prevotella sp. HMT 317	module_7	Leptotrichia sp. HMT 498	module_8
Leptotrichia shahii	module_11	Fusobacterium nucleatum subsp. animalis	module_7	Lactobacillus jensenii	module_7	Selenomonas sp. HMT 136	module_7	Prevotella nigrescens	module_7	Leptotrichia wadei	module_8
Leptotrichia wadei	module_11	Fusobacterium sp. HMT 203	module_7	Sneathia sanguinegens	module_7	Selenomonas sp. HMT 478	module_7	Catonella morbi	module_7	Leptotrichia sp. HMT 417	module_8
Leptotrichia sp. HMT 417	module_11	Fusobacterium nucleatum subsp. polymorphum	module_7	Sneathia vaginalis	module_7	Rhodobacter capsulatus	module_8	Selenomonas infelix	module_8	Leptotrichia shahii	module_8
Corynebacterium matruchotii	module_11	Fusobacterium nucleatum subsp. nucleatum	module_7	Selenomonas sp. HMT 126	module_8	Enterococcus saccharolyticus	module_8	Prevotella denticola	module_8	Cupriavidus gilardii	module_9
Acidovorax ebreus	module_12	Enterococcus durans	module_8	Selenomonas infelix	module_8	Enterococcus italicus	module_8	Prevotella veroralis	module_8	Bordetella pertussis	module_9
Acidovorax caeni	module_12	Staphylococcus haemolyticus	module_8	Selenomonas sp. HMT 920	module_8	Enterococcus casseliflavus	module_8	Prevotella sp. HMT 376	module_8	Brevundimonas diminuta	module_9
Comamonas testosteroni	module_12	Enterococcus italicus	module_8	Centipeda periodontii	module_8	Prevotella saccharolytica	module_9	Prevotella enoeca	module_8	Variovorax paradoxus	module_9
Acidovorax temperans	module_12	Enterococcus saccharolyticus	module_8	Selenomonas sp. HMT 138	module_8	Prevotella sp. HMT 317	module_9	Prevotella marshii	module_9	Ralstonia pickettii	module_9
Prevotella multiformis	module_13	Enterococcus faecalis	module_8	Stomatobaculum longum	module_9	Alloprevotella tannerae	module_9	Dialister invisus	module_9	Lachnospiraceae [G-8] bacterium HMT 500	module_10
Prevotella aurantiaca	module_13	Haemophilus aegyptius	module_9	Lachnoanaerobaculum orale	module_9	Prevotella sp. HMT 475	module_9	Prevotella oris	module_9	Eggerthia catenaformis	module_10
Prevotella pallens	module_13	Haemophilus sp. HMT 036	module_9	Lachnospiraceae_[G-2] bacterium_HMT_096	module_9	Fusobacterium nucleatum subsp. nucleatum	module_10	Prevotella multisaccharivorax	module_9	Alloprevotella tannerae	module_10
Selenomonas sp. HMT 149	module_14	Haemophilus haemolyticus	module_9	Lachnospiraceae [G-2] bacterium HMT 096	module_9	Fusobacterium nucleatum	module_10	Prevotella buccae	module_9	Mogibacterium timidum	module_10
Selenomonas sp. HMT 478	module_14	Haemophilus influenzae	module_9	Neisseria flavescens	module_10	Fusobacterium nucleatum subsp. vincentii	module_10	Variovorax paradoxus	module_10	Peptostreptococcaceae [G-6] [Eubacterium] nodatum	module_10
Selenomonas sp. HMT 892	module_14	Streptococcus australis	module_10	Simonsiella muelleri	module_10	Streptococcus peroris	module_11	Delftia acidovorans	module_10	Lactobacillus jensenii	module_11
Prevotella intermedia	module_15	Streptococcus sp._HMT_061	module_10	Neisseria subflava	module_10	Streptococcus sp._HMT_061	module_11	Acidovorax ebreus	module_10	Methanobrevibacter oralis	module_11
Prevotella marshii	module_15	Streptococcus peroris	module_10	Neisseria perflava	module_10	Streptococcus infantis	module_11	Brevundimonas diminuta	module_10	Sneathia sanguinegens	module_11
Saccharibacteria (TM7) [G-1] bacterium HMT 952	module_15	Streptococcus infantis	module_10	Haemophilus parainfluenzae	module_11	Streptococcus sp. HMT 066	module_12	Burkholderia cepacia	module_10	Sneathia vaginalis	module_11
Limosilactobacillus reuteri	module_16	Prevotella intermedia	module_11	Haemophilus pittmaniae	module_11	Streptococcus lactarius	module_12	Paenibacillus glucanolyticus	module_11	Limosilactobacillus panis	module_11
Listeria monocytogenes	module_16	Alloprevotella rava	module_11	Haemophilus sputorum	module_11	Streptococcus parasanguinis	module_12	Bacillus subtilis	module_11	Peptoniphilus sp. HMT 386	module_12
Bacillus anthracis	module_16	Prevotella nigrescens	module_11	Haemophilus ducreyi	module_11	Helicobacter pylori	module_13	Enterococcus casseliflavus	module_11	Prevotella sp. HMT 475	module_12
Alloprevotella rava	module_17	Catonella morbi	module_12	Selenomonas flueggei	module_12	Escherichia coli	module_13	Alkalihalobacillus clausii	module_11	Peptostreptococcaceae [G-7] bacterium HMT 081	module_12
Prevotella buccae	module_17	Prevotella loescheii	module_12	Selenomonas sp. HMT 149	module_12	Saccharibacteria (TM7) [G-8] bacterium HMT 955	module_13	Pseudomonas oleovorans	module_12	Peptoniphilaceae [G-1] bacterium HMT 113	module_12
Prevotella oris	module_17	Prevotella sp. HMT 472	module_12	Selenomonas sp. HMT 478	module_12	Haemophilus sp. HMT 036	module_14	Pseudomonas fluorescens	module_12	Catonella morbi	module_13
Streptococcus lactarius	module_18	Lentilactobacillus buchneri	module_13	Selenomonas sp. HMT 136	module_12	Haemophilus haemolyticus	module_14	Pseudomonas stutzeri	module_12	Fusobacterium nucleatum subsp. polymorphum	module_13
Streptococcus sp. HMT 066	module_18	Ligilactobacillus salivarius	module_13	Anaerococcus lactolyticus	module_13	Haemophilus influenzae	module_14	Pseudomonas aeruginosa	module_12	Fusobacterium sp. HMT 203	module_13
Streptococcus parasanguinis	module_18	Staphylococcus epidermidis	module_13	Peptoniphilus sp. HMT 375	module_13	Treponema vincentii	module_15	Prevotella salivae	module_13	Fusobacterium hwasookii	module_13
Leptotrichia buccalis	module_19	Capnocytophaga sp. HMT 878	module_14	Finegoldia magna	module_13	Selenomonas sp. HMT 126	module_15	Prevotella jejuni	module_13	Selenomonas flueggei	module_14
Leptotrichia sp. HMT 225	module_19	Capnocytophaga leadbetteri	module_14	Peptoniphilus harei	module_13	Catonella morbi	module_15	Prevotella sp. HMT 306	module_13	Selenomonas sp. HMT 149	module_14
Leptotrichia hofstadii	module_19	Capnocytophaga sp. HMT 332	module_14	Prevotella oris	module_14	Pseudomonas fluorescens	module_16	Prevotella pallens	module_13	Selenomonas sp. HMT 478	module_14
Neisseria gonorrhoeae	module_20	Streptococcus oralis subsp. oralis	module_15	Prevotella enoeca	module_14	Pseudomonas stutzeri	module_16	Selenomonas sp. HMT 478	module_14	Selenomonas sp. HMT 136	module_14
Neisseria mucosa	module_20	Streptococcus sp._HMT_064	module_15	Alloprevotella rava	module_14	Acinetobacter baumannii	module_16	Selenomonas flueggei	module_14	Campylobacter rectus	module_15
Neisseria cinerea	module_20	Streptococcus oralis	module_15	Prevotella maculosa	module_14	Prevotella jejuni	module_17	Selenomonas sp. HMT 136	module_14	Treponema vincentii	module_15
Haemophilus pittmaniae	module_21	Neisseria flavescens	module_16	Prevotella veroralis	module_15	Prevotella aurantiaca	module_17	Selenomonas sp. HMT 149	module_14	Treponema medium	module_15
Haemophilus parainfluenzae	module_21	Neisseria perflava	module_16	Prevotella pallens	module_15	Prevotella pallens	module_17	Streptococcus australis	module_15	Campylobacter showae	module_15
Streptococcus sp._HMT_061	module_21	Neisseria subflava	module_16	Prevotella aurantiaca	module_15	Fusobacterium hwasookii	module_18	Streptococcus peroris	module_15	Bacteroides zoogleoformans	module_16
Oribacterium sinus	module_22	Porphyromonas pasteri	module_17	Prevotella histicola	module_15	Fusobacterium sp. HMT 203	module_18	Streptococcus sp._HMT_061	module_15	Phocaeicola abscessus	module_16
Oribacterium parvum	module_22	Porphyromonas sp. HMT 275	module_17	Streptococcus sp._HMT_064	module_16	Fusobacterium nucleatum subsp. polymorphum	module_18	Streptococcus infantis	module_15	Tannerella forsythia	module_16
Oribacterium asaccharolyticum	module_22	Porphyromonas catoniae	module_17	Streptococcus oralis subsp. oralis	module_16	Prevotella veroralis	module_19	Prevotella sp. HMT 475	module_16	Prevotella multiformis	module_16
Variovorax paradoxus	module_23	Streptococcus parasanguinis	module_18	Streptococcus oralis	module_16	Prevotella sp. HMT 306	module_19	Bacteroides zoogleoformans	module_16	Fannyhessea vaginae	module_17
Schlegelella thermodepolymerans	module_23	Streptococcus lactarius	module_18	Lachnospiraceae [G-8] bacterium HMT 500	module_17	Lancefieldella parvula	module_19	Prevotella micans	module_16	Corynebacterium aurimucosum	module_17
Escherichia coli	module_23	Streptococcus sp. HMT 066	module_18	Peptostreptococcaceae [G-7] bacterium HMT 081	module_17	Capnocytophaga gingivalis	module_20	Campylobacter rectus	module_16	Lacticaseibacillus rhamnosus	module_17
Lactiplantibacillus plantarum	module_24	Veillonella dispar	module_19	Eggerthia catenaformis	module_17	Capnocytophaga granulosa	module_20	Veillonella dispar	module_17	Corynebacterium simulans	module_17
Aerococcus viridans	module_24	Veillonella parvula	module_19	Eikenella corrodens	module_18	Capnocytophaga sp. HMT 332	module_20	Veillonella denticariosi	module_17	Haemophilus haemolyticus	module_18
Ligilactobacillus salivarius	module_24	Veillonella denticariosi	module_19	Neisseria macacae	module_18	Aggregatibacter sp. HMT 458	module_21	Veillonella parvula	module_17	Haemophilus pittmaniae	module_18
Neisseria flavescens	module_25	Gemella sp. HMT 928	module_20	Neisseria sicca	module_18	Aggregatibacter segnis	module_21	Veillonella rogosae	module_17	Haemophilus sp. HMT 036	module_18
Neisseria perflava	module_25	Gemella bergeri	module_20	Streptococcus sp._HMT_061	module_19	Aggregatibacter sp. HMT 513	module_21	Centipeda periodontii	module_18	Haemophilus paraphrohaemolyticus	module_18
Neisseria subflava	module_25	Gemella haemolysans	module_20	Streptococcus peroris	module_19	Haemophilus parainfluenzae	module_22	Selenomonas sp. HMT 126	module_18	Selenomonas infelix	module_19
Selenomonas sp. HMT 920	module_26	Streptococcus pyogenes	module_21	Streptococcus infantis	module_19	Haemophilus sputorum	module_22	Selenomonas sp. HMT 892	module_18	Selenomonas sp. HMT 892	module_19
Selenomonas infelix	module_26	Streptococcus sinensis	module_21	Porphyromonas sp. HMT 278	module_20	Haemophilus pittmaniae	module_22	Selenomonas sp. HMT 138	module_18	Selenomonas sp. HMT 138	module_19
Selenomonas noxia	module_26	Streptococcus sanguinis	module_21	Leptotrichia sp. HMT 879	module_20	Enterococcus faecalis	module_23	Methanobrevibacter oralis	module_19	Selenomonas sp. HMT 920	module_19
Saccharibacteria (TM7) [G-1] bacterium HMT 348	module_27	Pseudomonas aeruginosa	module_22	Corynebacterium aurimucosum	module_20	Staphylococcus aureus	module_23	Limosilactobacillus panis	module_19	Haematobacter missouriensis	module_20
Corynebacterium simulans	module_27	Pseudomonas oleovorans	module_22	Alloprevotella sp. HMT 473	module_21	Enterococcus durans	module_23	Bradyrhizobium elkanii	module_19	Paracoccus yeei	module_20
Fannyhessea vaginae	module_27	Pseudomonas stutzeri	module_22	Prevotella baroniae	module_21	Leptotrichia hofstadii	module_24	Lactobacillus jensenii	module_19	Rhodobacter capsulatus	module_20
Limosilactobacillus panis	module_28	Fusobacterium periodonticum	module_23	Prevotella sp. HMT 376	module_21	Leptotrichia sp. HMT 225	module_24	Fusobacterium periodonticum	module_20	Anoxybacillus flavithermus	module_21
Lactobacillus jensenii	module_28	Fusobacterium sp. HMT 370	module_23	Streptococcus lactarius	module_22	Leptotrichia hongkongensis	module_24	Fusobacterium nucleatum subsp. polymorphum	module_20	Lactiplantibacillus plantarum	module_21
Campylobacter ureolyticus	module_28	Fusobacterium sp. HMT 248	module_23	Streptococcus sp. HMT 066	module_22	Streptococcus cristatus	module_25	Fusobacterium hwasookii	module_20	Bacillus subtilis	module_21
Pseudomonas oleovorans	module_29	Capnocytophaga sputigena	module_24	Streptococcus parasanguinis	module_22	Streptococcus sanguinis	module_25	Streptococcus sanguinis	module_21	Peptostreptococcus stomatis	module_22
Acinetobacter baumannii	module_29	Capnocytophaga endodontalis	module_24	Streptococcus thermophilus	module_23	Streptococcus sinensis	module_25	Streptococcus sinensis	module_21	Parvimonas micra	module_22
Pseudomonas stutzeri	module_29	Capnocytophaga granulosa	module_24	Streptococcus salivarius	module_23	Streptococcus oralis subsp. oralis	module_26	Streptococcus cristatus	module_21	Parvimonas sp. HMT 393	module_22
Schaalia sp. HMT 178	module_30	Oribacterium parvum	module_25	Streptococcus vestibularis	module_23	Streptococcus oralis	module_26	Prevotella buccalis	module_22	Acidovorax ebreus	module_23
Schaalia sp. HMT 877	module_30	Oribacterium sinus	module_25	Capnocytophaga sputigena	module_24	Streptococcus sp._HMT_064	module_26	Prevotella maculosa	module_22	Burkholderia cepacia	module_23
Schaalia georgiae	module_30	Oribacterium asaccharolyticum	module_25	Capnocytophaga haemolytica	module_24	Streptococcus vestibularis	module_27	Prevotella baroniae	module_22	Delftia acidovorans	module_23
Corynebacterium accolens	module_31	Streptococcus thermophilus	module_26	Capnocytophaga endodontalis	module_24	Streptococcus thermophilus	module_27	Leptotrichia sp. HMT 225	module_23	Streptococcus lactarius	module_24
Corynebacterium tuberculostearicum	module_31	Streptococcus vestibularis	module_26	Prevotella dentalis	module_25	Streptococcus salivarius	module_27	Leptotrichia hofstadii	module_23	Streptococcus parasanguinis	module_24
Corynebacterium urealyticum	module_31	Stenotrophomonas nitritireducens	module_27	Bacteroides zoogleoformans	module_25	Prevotella enoeca	module_28	Leptotrichia buccalis	module_23	Streptococcus sp. HMT 066	module_24
Cutibacterium avidum	module_32	Stenotrophomonas maltophilia	module_27	Phocaeicola abscessus	module_25	Prevotella maculosa	module_28	Haemophilus sputorum	module_24	Leptotrichia sp. HMT 879	module_25
Cutibacterium acnes	module_32	Haemophilus pittmaniae	module_28	Leptotrichia sp. HMT 417	module_26	Prevotella oris	module_28	Haemophilus parainfluenzae	module_24	Porphyromonas sp. HMT 278	module_25
Neisseria macacae	module_33	Haemophilus parainfluenzae	module_28	Pseudoleptotrichia sp. HMT 221	module_26	Prevotella melaninogenica	module_29	Haemophilus pittmaniae	module_24	Saccharibacteria (TM7) [G-1] bacterium HMT 348	module_25
Neisseria sicca	module_33	Prevotella marshii	module_29	Leptotrichia sp. HMT 218	module_26	Prevotella scopos	module_29	Streptococcus oralis subsp. oralis	module_25	Porphyromonas pasteri	module_26
Enhydrobacter aerosaccus	module_34	Prevotella denticola	module_29	Leptotrichia wadei	module_27	Prevotella histicola	module_29	Streptococcus oralis	module_25	Lachnoanaerobaculum umeaense	module_26
Moraxella osloensis	module_34	Stomatobaculum longum	module_30	Leptotrichia buccalis	module_27	Streptococcus pneumoniae	module_30	Streptococcus sp._HMT_064	module_25	Porphyromonas sp. HMT 275	module_26
Tannerella forsythia	module_35	Solobacterium moorei	module_30	Leptotrichia hofstadii	module_27	Streptococcus mitis	module_30	Saccharibacteria (TM7) [G-1] bacterium HMT 952	module_26	Saccharibacteria (TM7) [G-1] bacterium HMT 488	module_27
Prevotella pleuritidis	module_35	Neisseria lactamica	module_31	Prevotella sp. HMT 317	module_28	Gemella haemolysans	module_30	Saccharibacteria (TM7) [G-1] bacterium HMT 488	module_26	Saccharibacteria (TM7) [G-1] bacterium HMT 952	module_27
Saccharibacteria_(TM7)_[G-1] bacterium_HMT_349	module_36	Neisseria meningitidis	module_31	Prevotella saccharolytica	module_28	Prevotella dentalis	module_31	Saccharibacteria (TM7) [G-1] bacterium HMT 957	module_26	Saccharibacteria (TM7) [G-1] bacterium HMT 957	module_27
Lachnoanaerobaculum saburreum	module_36	Aggregatibacter aphrophilus	module_32	Streptococcus gordonii	module_29	Prevotella baroniae	module_31	Parvimonas micra	module_27	Shuttleworthia satelles	module_28
Rothia mucilaginosa	module_37	Aggregatibacter paraphrophilus	module_32	Streptococcus sp. HMT 056	module_29	Capnocytophaga sp. HMT 878	module_32	Parvimonas sp. HMT 393	module_27	Lancefieldella sp. HMT 199	module_28
Fusobacterium sp. HMT 370	module_37	Aggregatibacter segnis	module_33	Enterococcus casseliflavus	module_30	Capnocytophaga sp. HMT 863	module_32	Parvimonas sp. HMT 110	module_27	Lancefieldella rimae	module_28
Corynebacterium striatum	module_38	Aggregatibacter sp. HMT 513	module_33	Rhodobacter capsulatus	module_30	Selenomonas artemidis	module_33	Lactiplantibacillus plantarum	module_28	Leptotrichia hofstadii	module_29
Cutibacterium sp. HMT 193	module_38	Veillonella atypica	module_34	Leptotrichia sp. HMT 223	module_31	Selenomonas sp. HMT 137	module_33	Lentilactobacillus buchneri	module_28	Leptotrichia buccalis	module_29
Streptococcus pyogenes	module_39	Prevotella histicola	module_34	Dialister micraerophilus	module_31	Parvimonas sp. HMT 110	module_34	Levilactobacillus brevis	module_28	Leptotrichia sp. HMT 225	module_29
Haemophilus influenzae	module_39	Actinomyces sp. HMT 448	module_35	Prevotella sp. HMT 472	module_32	Parvimonas sp. HMT 393	module_34	Lachnoanaerobaculum orale	module_29	Staphylococcus aureus	module_30
Ralstonia pickettii	module_40	Acidipropionibacterium acidifaciens	module_35	Prevotella loescheii	module_32	Prevotella micans	module_35	Tannerella sp. HMT 286	module_29	Listeria monocytogenes	module_30
Cupriavidus gilardii	module_40	Prevotella enoeca	module_36	Microbacterium flavescens	module_33	Prevotella pleuritidis	module_35	Stomatobaculum longum	module_29	Bacillus anthracis	module_30
Selenomonas flueggei	module_41	Prevotella sp. HMT 317	module_36	Microbacterium ginsengisoli	module_33	Actinomyces sp. HMT 414	module_36	Cardiobacterium hominis	module_30	Neisseria subflava	module_31
Selenomonas sp. HMT 136	module_41	Leptotrichia sp. HMT 225	module_37	Prevotella nigrescens	module_34	Actinomyces dentalis	module_36	Neisseria bacilliformis	module_30	Neisseria perflava	module_31
Parvimonas sp. HMT 110	module_42	Leptotrichia hofstadii	module_37	Prevotella sp. HMT 820	module_34	Alloscardovia omnicolens	module_37	Leptotrichia sp. HMT 212	module_30	Neisseria flavescens	module_31
Peptostreptococcaceae [G-1] [Eubacterium] infirmum	module_42	Parvimonas sp. HMT 110	module_38	Haemophilus influenzae	module_35	Shuttleworthia satelles	module_37	Capnocytophaga sputigena	module_31	Limosilactobacillus oris	module_32
Leptotrichia sp. HMT 223	module_43	Parvimonas sp. HMT 393	module_38	Haemophilus aegyptius	module_35	Cupriavidus gilardii	module_38	Capnocytophaga sp. HMT 878	module_31	Limosilactobacillus reuteri	module_32
Streptococcus oralis	module_43	Listeria monocytogenes	module_39	Kingella denitrificans	module_36	Ralstonia pickettii	module_38	Capnocytophaga endodontalis	module_31	Limosilactobacillus fermentum	module_32
Aggregatibacter segnis	module_44	Anoxybacillus flavithermus	module_39	Neisseria elongata	module_36	Enhydrobacter aerosaccus	module_39	Capnocytophaga sp. HMT 332	module_32	Prevotella oulorum	module_33
Aggregatibacter sp. HMT 458	module_44	Prevotella salivae	module_40	Johnsonella ignava	module_37	Moraxella osloensis	module_39	Capnocytophaga sp. HMT 863	module_32	Prevotella jejuni	module_33
Acinetobacter junii	module_45	Lancefieldella parvula	module_40	Peptostreptococcaceae [G-6] [Eubacterium] nodatum	module_37	Peptostreptococcus stomatis	module_40	Capnocytophaga granulosa	module_32	Prevotella pallens	module_33
Acinetobacter johnsonii	module_45	Cutibacterium acnes	module_41	Enterococcus italicus	module_38	Peptostreptococcaceae [G-7] bacterium HMT 081	module_40	Paracoccus yeei	module_33	Pseudomonas oleovorans	module_34
Actinomyces dentalis	module_46	Limosilactobacillus reuteri	module_41	Enterococcus saccharolyticus	module_38	Streptococcus sp. HMT 056	module_41	Rhodobacter capsulatus	module_33	Acinetobacter baumannii	module_34
Actinomyces sp. HMT 414	module_46	Alkalihalobacillus clausii	module_42	Enterococcus faecalis	module_39	Streptococcus gordonii	module_41	Haematobacter missouriensis	module_33	Klebsiella pneumoniae	module_34
Fusobacterium nucleatum	module_47	Paracoccus yeei	module_42	Enterococcus durans	module_39	Aggregatibacter paraphrophilus	module_42	Solobacterium moorei	module_34	Haemophilus parahaemolyticus	module_35
Porphyromonas gingivalis	module_47	Cupriavidus gilardii	module_43	Saccharibacteria (TM7) [G-1] bacterium HMT 952	module_40	Aggregatibacter aphrophilus	module_42	Peptostreptococcus stomatis	module_34	Haemophilus influenzae	module_35
Fusobacterium nucleatum subsp. vincentii	module_48	Ralstonia pickettii	module_43	Saccharibacteria (TM7) [G-1] bacterium HMT 488	module_40	Lacticaseibacillus casei	module_43	Peptostreptococcaceae [G-1] [Eubacterium] infirmum	module_34	Haemophilus aegyptius	module_35
Parvimonas micra	module_48	Streptococcus agalactiae	module_44	Stenotrophomonas maltophilia	module_41	Lacticaseibacillus paracasei	module_43	Leptotrichia sp. HMT 218	module_35	Olsenella uli	module_36
Fusobacterium hwasookii	module_49	Gardnerella vaginalis	module_44	Stenotrophomonas nitritireducens	module_41	Campylobacter ureolyticus	module_44	Leptotrichia sp. HMT 417	module_35	Peptoniphilus lacrimalis	module_36
Fusobacterium nucleatum subsp. polymorphum	module_49	Prevotella veroralis	module_45	Prevotella bivia	module_42	Mycoplasma hominis	module_44	Lachnospiraceae [G-2] bacterium HMT 096	module_36	Oribacterium sp. HMT 102	module_36
Streptococcus sanguinis	module_50	Prevotella sp. HMT 306	module_45	Prevotella marshii	module_42	Mogibacterium timidum	module_45	Lachnospiraceae_[G-2] bacterium_HMT_096	module_36	Streptococcus sp._HMT_061	module_37
Streptococcus sp. HMT 056	module_50	Selenomonas sp. HMT 478	module_46	Streptococcus constellatus	module_43	Eggerthia catenaformis	module_45	Mycoplasma hominis	module_37	Streptococcus infantis	module_37
Leptotrichia sp. HMT 212	module_51	Selenomonas sp. HMT 149	module_46	Streptococcus intermedius	module_43	Prevotella nanceiensis	module_46	Gracilibacteria (GN02) [G-4] bacterium HMT 997	module_37	Streptococcus peroris	module_37
Leptotrichia hongkongensis	module_51	Bifidobacterium longum	module_47	Acinetobacter baumannii	module_44	Prevotella fusca	module_46	Peptoniphilus harei	module_38	Neisseria sicca	module_38
Prevotella sp. HMT 306	module_52	Rhodobacter capsulatus	module_47	Acinetobacter lwoffii	module_44	Porphyromonas endodontalis	module_47	Anaerococcus lactolyticus	module_38	Neisseria macacae	module_38
Prevotella jejuni	module_52	Streptococcus mitis	module_48	Lancefieldella parvula	module_45	Selenomonas sp. HMT 892	module_47	Enterococcus italicus	module_39	Neisseria oralis	module_38
Lachnospiraceae [G-2] bacterium HMT 096	module_53	Streptococcus pneumoniae	module_48	Lancefieldella sp. HMT 199	module_45	Campylobacter rectus	module_48	Enterococcus saccharolyticus	module_39	Cronobacter sakazakii	module_39
Lachnospiraceae_[G-2] bacterium_HMT_096	module_53	Capnocytophaga sp. HMT 863	module_49	Streptococcus cristatus	module_46	Campylobacter showae	module_48	Acidovorax temperans	module_40	Mesorhizobium japonicum	module_39
Granulicatella elegans	module_54	Capnocytophaga sp. HMT 338	module_49	Streptococcus sinensis	module_46	Stenotrophomonas maltophilia	module_49	Acidovorax caeni	module_40	Agrobacterium tumefaciens	module_39
Cutibacterium granulosum	module_54	Prevotella aurantiaca	module_50	Porphyromonas pasteri	module_47	Stenotrophomonas nitritireducens	module_49	Tannerella sp._HMT_808	module_41	Haemophilus sputorum	module_40
Gemella sanguinis	module_55	Prevotella multiformis	module_50	Porphyromonas sp. HMT 275	module_47	Centipeda periodontii	module_50	Prevotella saccharolytica	module_41	Haemophilus ducreyi	module_40
Fusobacterium periodonticum	module_55	Pseudomonas fluorescens	module_51	Schaalia odontolytica	module_48	Selenomonas sp. HMT 920	module_50	Peptostreptococcaceae [G-6] [Eubacterium] nodatum	module_42	Haemophilus parainfluenzae	module_40
Porphyromonas endodontalis	module_56	Bifidobacterium subtile	module_51	Schaalia sp. HMT 172	module_48	Treponema maltophilum	module_51	Mogibacterium timidum	module_42	Alkalihalobacillus clausii	module_41
Prevotella sp. HMT 317	module_56	Lacticaseibacillus casei	module_52	Prevotella pleuritidis	module_49	Treponema socranskii	module_51	Prevotella oulorum	module_43	Enterococcus casseliflavus	module_41
Lacticaseibacillus casei	module_57	Limosilactobacillus fermentum	module_52	Prevotella micans	module_49	Parvimonas micra	module_52	Prevotella sp. HMT 820	module_43	Paenibacillus glucanolyticus	module_41
Lacticaseibacillus paracasei	module_57	Acinetobacter baumannii	module_53	Selenomonas sp. HMT 137	module_50	Peptostreptococcaceae [G-6] [Eubacterium] nodatum	module_52	Dolosigranulum pigrum	module_44	Micrococcus luteus	module_42
Porphyromonas sp. HMT 278	module_58	Acinetobacter lwoffii	module_53	Selenomonas artemidis	module_50	Lacticaseibacillus rhamnosus	module_53	Alloiococcus otitis	module_44	Kocuria palustris	module_42
Corynebacterium aurimucosum	module_58	Haematobacter missouriensis	module_54	Aggregatibacter sp. HMT 458	module_51	Ignavibacterium album	module_53	Stenotrophomonas maltophilia	module_45	Kytococcus sedentarius	module_42
Streptococcus cristatus	module_59	Enterococcus casseliflavus	module_54	Aggregatibacter segnis	module_51	Mycoplasmopsis fermentans	module_54	Stenotrophomonas nitritireducens	module_45	Veillonella parvula	module_43
Streptococcus sinensis	module_59	Bacillus subtilis	module_55	Aggregatibacter aphrophilus	module_52	Desulfovibrio fairfieldensis	module_54	Streptococcus constellatus	module_46	Veillonella denticariosi	module_43
Lancefieldella parvula	module_60	Staphylococcus aureus	module_55	Aggregatibacter paraphrophilus	module_52	Haematobacter missouriensis	module_55	Streptococcus intermedius	module_46	Veillonella dispar	module_43
Prevotella oulorum	module_60	Enhydrobacter aerosaccus	module_56	Leptotrichia sp. HMT 215	module_53	Paracoccus yeei	module_55	Actinomyces graevenitzii	module_47	Aggregatibacter sp. HMT 513	module_44
Capnocytophaga sputigena	module_61	Moraxella osloensis	module_56	Leptotrichia sp. HMT 212	module_53	Fusobacterium sp. HMT 248	module_56	Schaalia lingnae	module_47	Aggregatibacter segnis	module_44
Capnocytophaga endodontalis	module_61	Streptococcus anginosus	module_57	Lactobacillus iners	module_54	Fusobacterium sp. HMT 370	module_56	Porphyromonas sp. HMT 278	module_48	Aggregatibacter sp. HMT 458	module_44
Neisseria meningitidis	module_62	Streptococcus constellatus	module_57	Peptoniphilus lacrimalis	module_54	Peptostreptococcaceae [G-1] [Eubacterium] infirmum	module_57	Leptotrichia sp. HMT 879	module_48	Prevotella loescheii	module_45
Neisseria lactamica	module_62	Neisseria elongata	module_58	Oribacterium parvum	module_55	Tannerella sp. HMT 286	module_57	Haemophilus influenzae	module_49	Prevotella sp. HMT 472	module_45
Lactobacillus johnsonii	module_63	Kingella denitrificans	module_58	Oribacterium asaccharolyticum	module_55	Alloprevotella rava	module_58	Haemophilus aegyptius	module_49	Prevotella saccharolytica	module_45
Lactobacillus acidophilus	module_63	Leptotrichia wadei	module_59	Prevotella nanceiensis	module_56	Prevotella buccae	module_58	Phocaeicola abscessus	module_50	Lactobacillus crispatus	module_46
Capnocytophaga leadbetteri	module_64	Leptotrichia sp. HMT 218	module_59	Prevotella intermedia	module_56	Prevotella bivia	module_59	Campylobacter curvus	module_50	Lactobacillus acidophilus	module_46
Neisseria elongata	module_64	Lancefieldella rimae		Parvimonas sp. HMT 393	module_57	Prevotella buccalis	module_59	Fusobacterium nucleatum subsp. vincentii	module_51	Limosilactobacillus vaginalis	module_46
Prevotella veroralis	module_65	Corynebacterium matruchotii		Parvimonas micra	module_57	Streptococcus constellatus	module_60	Capnocytophaga sp. HMT 338	module_51	Fusobacterium nucleatum	module_47
Prevotella nanceiensis	module_65	Eikenella corrodens		Porphyromonas uenonis	module_58	Streptococcus intermedius	module_60	Prevotella histicola	module_52	Fusobacterium sp. HMT 248	module_47
Fusobacterium sp. HMT 203	module_66	Peptostreptococcaceae [G-5] [Eubacterium] saphenum		Prevotella buccalis	module_58	Prevotella sp. HMT 472	module_61	Prevotella oralis	module_52	Fusobacterium sp. HMT 370	module_47
Granulicatella adiacens	module_66	Filifactor alocis		Lachnoanaerobaculum sp. HMT 083	module_59	Prevotella loescheii	module_61	Selenomonas artemidis	module_53	Yersinia pestis	module_48
Prevotella scopos	module_67	Mesorhizobium japonicum		Lachnoanaerobaculum umeaense	module_59	Schlegelella thermodepolymerans	module_62	Selenomonas sp. HMT 137	module_53	Enterobacter cancerogenus	module_48
Prevotella melaninogenica	module_67	Lactobacillus johnsonii		Prevotella multiformis	module_60	Achromobacter xylosoxidans	module_62	Actinomyces sp. HMT 414	module_54	Pseudomonas fluorescens	module_48
Leptotrichia sp. HMT 498	module_68	Haemophilus ducreyi		Prevotella denticola	module_60	Schaalia sp. HMT 877	module_63	Actinomyces dentalis	module_54	Centipeda periodontii	module_49
Leptotrichia sp. HMT 847	module_68	Olsenella uli		Haematobacter missouriensis	module_61	Schaalia sp. HMT 178	module_63	Selenomonas sp. HMT 920	module_55	Selenomonas sp. HMT 126	module_49
Gemella haemolysans	module_69	Mycobacterium tuberculosis		Paracoccus yeei	module_61	Eikenella corrodens	module_64	Campylobacter showae	module_55	Selenomonas sputigena	module_49
Haemophilus haemolyticus	module_69	Porphyromonas endodontalis		Schaalia sp. HMT 877	module_62	Capnocytophaga sputigena	module_64	Streptococcus pyogenes	module_56	Streptococcus vestibularis	module_50
Streptococcus mitis	module_70	Mycobacterium leprae		Schaalia sp. HMT 178	module_62	Prevotella nigrescens	module_65	Lactobacillus crispatus	module_56	Streptococcus salivarius	module_50
Streptococcus pneumoniae	module_70	Bacillus anthracis		Streptococcus mitis	module_63	Saccharibacteria (TM7) [G-1] bacterium HMT 957	module_65	Lacticaseibacillus paracasei	module_57	Streptococcus thermophilus	module_50
Mycoplasma pneumoniae	module_71	Rothia mucilaginosa		Streptococcus pneumoniae	module_63	Pseudomonas aeruginosa	module_66	Cutibacterium acnes	module_57	Prevotella histicola	module_51
Mycoplasmopsis fermentans	module_71	Shuttleworthia satelles		Prevotella oulorum	module_64	Pseudomonas oleovorans	module_66	Absconditabacteria (SR1) [G-1] bacterium HMT 874	module_58	Prevotella scopos	module_51
Peptoniphilus harei	module_72	Yersinia pestis		Prevotella oralis	module_64	Neisseria sp. HMT 020	module_67	Treponema medium	module_58	Prevotella melaninogenica	module_51
Peptoniphilus lacrimalis	module_72	Treponema denticola		Paenibacillus glucanolyticus	module_65	Neisseria elongata	module_67	Capnocytophaga gingivalis	module_59	Absconditabacteria (SR1) [G-1] bacterium HMT 991	module_52
Actinomyces naeslundii	module_73	Treponema pallidum		Alkalihalobacillus clausii	module_65	Lancefieldella rimae		Capnocytophaga leadbetteri	module_59	Gracilibacteria_(GN02)_[G-3] bacterium_HMT_996	module_52
Actinomyces johnsonii	module_73	Streptococcus gordonii		Pseudomonas oleovorans	module_66	Corynebacterium matruchotii		Helicobacter pylori	module_60	Bacteroidales [G-2] bacterium HMT 274	module_53
Streptococcus mutans	module_74	Streptococcus mutans		Pseudomonas fluorescens	module_66	Cutibacterium acnes		Sneathia sanguinegens	module_60	Tannerella sp._HMT_808	module_53
Desulfovibrio fairfieldensis	module_74	Tannerella forsythia		Aggregatibacter sp. HMT 513	module_67	Peptostreptococcaceae [G-5] [Eubacterium] saphenum		Eggerthia catenaformis	module_61	Lentilactobacillus buchneri	module_54
Prevotella denticola	module_75	Lactobacillus acidophilus		Aggregatibacter actinomycetemcomitans	module_67	Filifactor alocis		Peptoniphilus sp. HMT 386	module_61	Levilactobacillus brevis	module_54
Prevotella nigrescens	module_75	Fusobacterium nucleatum subsp. vincentii		Lancefieldella rimae		Mesorhizobium japonicum		Comamonas testosteroni	module_62	Streptococcus sobrinus	module_55
Alloprevotella tannerae	module_76	Anaerococcus prevotii		Corynebacterium matruchotii		Lactobacillus johnsonii		Klebsiella pneumoniae	module_62	Lentilactobacillus parafarraginis	module_55
Bacteroidales [G-2] bacterium HMT 274	module_76	Bordetella pertussis		Cutibacterium acnes		Haemophilus ducreyi		Schaalia sp. HMT 178	module_63	Aggregatibacter aphrophilus	module_56
Streptococcus peroris	module_77	Agrobacterium tumefaciens		Peptostreptococcaceae [G-5] [Eubacterium] saphenum		Olsenella uli		Schaalia sp. HMT 877	module_63	Aggregatibacter paraphrophilus	module_56
Gemella morbillorum	module_77	Mitsuokella multacida		Filifactor alocis		Mycobacterium tuberculosis		Leptotrichia sp. HMT 847	module_64	Enterococcus faecalis	module_57
Stenotrophomonas nitritireducens	module_78	Moraxella catarrhalis		Gemella haemolysans		Mycobacterium leprae		Leptotrichia wadei	module_64	Enterococcus durans	module_57
Stenotrophomonas maltophilia	module_78	Dialister invisus		Mesorhizobium japonicum		Bacillus anthracis		Streptococcus mitis	module_65	Lacticaseibacillus casei	module_58
Aggregatibacter paraphrophilus	module_79	Escherichia coli		Lactobacillus johnsonii		Rothia mucilaginosa		Streptococcus pneumoniae	module_65	Lacticaseibacillus paracasei	module_58
Aggregatibacter sp. HMT 513	module_79	Campylobacter concisus		Olsenella uli		Listeria monocytogenes		Aggregatibacter segnis	module_66	Janibacter indicus	module_59
Delftia acidovorans	module_80	Campylobacter curvus		Mycobacterium tuberculosis		Yersinia pestis		Aggregatibacter sp. HMT 513	module_66	Dietzia cinnamea	module_59
Corynebacterium amycolatum	module_80	Chlamydia pneumoniae		Porphyromonas endodontalis		Treponema denticola		Megasphaera micronuciformis	module_67	Pseudomonas otitidis	module_60
Selenomonas sp. HMT 126	module_81	Corynebacterium diphtheriae		Mycobacterium leprae		Treponema pallidum		Pseudoleptotrichia sp. HMT 221	module_67	Pseudomonas stutzeri	module_60
Selenomonas sp. HMT 138	module_81	Cronobacter sakazakii		Bacillus anthracis		Porphyromonas gingivalis		Prevotella scopos	module_68	Escherichia coli	module_61
Prevotella saccharolytica	module_82	Arcanobacterium haemolyticum		Rothia mucilaginosa		Streptococcus mutans		Prevotella melaninogenica	module_68	Lactococcus lactis	module_61
Prevotella enoeca	module_82	Klebsiella pneumoniae		Shuttleworthia satelles		Tannerella forsythia		Peptoniphilus sp. HMT 375	module_69	Olsenella sp. HMT 807	module_62
Lancefieldella rimae		Levilactobacillus brevis		Listeria monocytogenes		Lactobacillus acidophilus		Lactobacillus iners	module_69	Saccharibacteria (TM7) [G-8] bacterium HMT 955	module_62
Eikenella corrodens		Lacticaseibacillus paracasei		Yersinia pestis		Aggregatibacter actinomycetemcomitans		Listeria monocytogenes	module_70	Streptococcus gordonii	module_63
Peptostreptococcaceae [G-5] [Eubacterium] saphenum		Lactobacillus gasseri		Treponema denticola		Anaerococcus prevotii		Acinetobacter baumannii	module_70	Streptococcus sp. HMT 056	module_63
Filifactor alocis		Mycoplasmopsis fermentans		Treponema pallidum		Bordetella pertussis		Mycoplasma pneumoniae	module_71	Staphylococcus capitis	module_64
Mesorhizobium japonicum		Mycoplasma genitalium		Porphyromonas gingivalis		Agrobacterium tumefaciens		Desulfovibrio fairfieldensis	module_71	Dolosigranulum pigrum	module_64
Haemophilus ducreyi		Mycoplasma pneumoniae		Streptococcus mutans		Mitsuokella multacida		Lentilactobacillus rapi	module_72	Actinomyces sp. HMT 414	module_65
Olsenella uli		Leptotrichia buccalis		Streptococcus sanguinis		Limosilactobacillus reuteri		Staphylococcus pasteuri	module_72	Actinomyces dentalis	module_65
Mycobacterium tuberculosis		Proteus mirabilis		Tannerella forsythia		Moraxella catarrhalis		Prevotella sp. HMT 472	module_73	Prevotella pleuritidis	module_66
Mycobacterium leprae		Streptococcus salivarius		Lactobacillus acidophilus		Dialister invisus		Prevotella loescheii	module_73	Bacteroides pyogenes	module_66
Shuttleworthia satelles		Lactobacillus crispatus		Fusobacterium nucleatum subsp. vincentii		Fusobacterium periodonticum		Agrobacterium tumefaciens	module_74	Lachnospiraceae_[G-2] bacterium_HMT_096	module_67
Yersinia pestis		Bifidobacterium dentium		Anaerococcus prevotii		Alkalihalobacillus clausii		Achromobacter xylosoxidans	module_74	Lachnospiraceae [G-2] bacterium HMT 096	module_67
Treponema denticola		Schaalia odontolytica		Bordetella pertussis		Bacillus subtilis		Acinetobacter lwoffii	module_75	Pseudoleptotrichia sp. HMT 221	module_68
Treponema pallidum		Peptostreptococcus stomatis		Agrobacterium tumefaciens		Campylobacter concisus		Lacticaseibacillus casei	module_75	Leptotrichia sp. HMT 218	module_68
Aggregatibacter actinomycetemcomitans		Variovorax paradoxus		Mitsuokella multacida		Campylobacter curvus		Gemella sanguinis	module_76	Schaalia sp. HMT 172	module_69
Fusobacterium nucleatum subsp. nucleatum		Delftia acidovorans		Limosilactobacillus reuteri		Chlamydia pneumoniae		Gemella haemolysans	module_76	Schaalia lingnae	module_69
Enterococcus faecalis		Bacteroidales [G-2] bacterium HMT 274		Moraxella catarrhalis		Corynebacterium diphtheriae		Anoxybacillus flavithermus	module_77	Bifidobacterium animalis	module_70
Anaerococcus prevotii		Prevotella nanceiensis		Dialister invisus		Cronobacter sakazakii		Bacillus anthracis	module_77	Streptococcus australis	module_70
Bordetella pertussis		Brucella anthropi		Helicobacter pylori		Arcanobacterium haemolyticum		Acinetobacter junii	module_78	Corynebacterium afermentans	module_71
Agrobacterium tumefaciens		Peptoniphilus sp. HMT 386		Escherichia coli		Klebsiella pneumoniae		Acinetobacter johnsonii	module_78	Corynebacterium bovis	module_71
Mitsuokella multacida		Lachnoanaerobaculum umeaense		Fusobacterium periodonticum		Levilactobacillus brevis		Moraxella osloensis	module_79	Stenotrophomonas maltophilia	module_72
Moraxella catarrhalis		Cryptobacterium curtum		Bacillus subtilis		Lactobacillus gasseri		Enhydrobacter aerosaccus	module_79	Stenotrophomonas nitritireducens	module_72
Dialister invisus		Enterobacter cancerogenus		Campylobacter concisus		Ligilactobacillus salivarius		Lautropia mirabilis	module_80	Achromobacter xylosoxidans	module_73
Campylobacter concisus		Lactococcus lactis		Campylobacter curvus		Mycoplasma genitalium		Neisseria elongata	module_80	Pseudomonas aeruginosa	module_73
Campylobacter curvus		Eggerthella lenta		Chlamydia pneumoniae		Mycoplasma pneumoniae		Enterococcus durans	module_81	Anaerococcus lactolyticus	module_74
Chlamydia pneumoniae		Campylobacter rectus		Corynebacterium diphtheriae		Leptotrichia buccalis		Enterococcus faecalis	module_81	Peptostreptococcus anaerobius	module_74
Neisseria polysaccharea		Selenomonas noxia		Cronobacter sakazakii		Proteus mirabilis		Olsenella sp. HMT 807	module_82	Anaerolineae [G-1] bacterium HMT 439	module_75
Corynebacterium diphtheriae		Kingella oralis		Arcanobacterium haemolyticum		Staphylococcus epidermidis		Lancefieldella rimae	module_82	Peptoniphilus sp. HMT 187	module_75
Cronobacter sakazakii		Abiotrophia defectiva		Lacticaseibacillus casei		Streptococcus agalactiae		Peptoniphilaceae [G-1] bacterium HMT 113	module_83	Corynebacterium amycolatum	module_76
Arcanobacterium haemolyticum		Alloprevotella tannerae		Klebsiella pneumoniae		Streptococcus pyogenes		Peptostreptococcaceae [G-7] bacterium HMT 081	module_83	Corynebacterium accolens	module_76
Aggregatibacter aphrophilus		Selenomonas sputigena		Levilactobacillus brevis		Lactobacillus crispatus		Haemophilus haemolyticus	module_84	Moraxella osloensis	module_77
Klebsiella pneumoniae		Slackia exigua		Lacticaseibacillus paracasei		Bifidobacterium dentium		Haemophilus sp. HMT 036	module_84	Enhydrobacter aerosaccus	module_77
Lactobacillus gasseri		Pseudoleptotrichia goodfellowii		Lactobacillus gasseri		Schaalia odontolytica		Streptococcus sp. HMT 056	module_85	Acidovorax temperans	module_78
Lacticaseibacillus rhamnosus		Capnocytophaga gingivalis		Ligilactobacillus salivarius		Variovorax paradoxus		Streptococcus gordonii	module_85	Comamonas testosteroni	module_78
Mycoplasma genitalium		Oribacterium sp. HMT 078		Mycoplasmopsis fermentans		Delftia acidovorans		Aggregatibacter paraphrophilus	module_86	Schaalia sp. HMT 877	module_79
Proteus mirabilis		Cardiobacterium hominis		Mycoplasma genitalium		Bacteroidales [G-2] bacterium HMT 274		Aggregatibacter aphrophilus	module_86	Schaalia sp. HMT 178	module_79
Staphylococcus aureus		Granulicatella adiacens		Mycoplasma pneumoniae		Brucella anthropi		Staphylococcus aureus	module_87	Schaalia meyeri	module_80
Staphylococcus epidermidis		Granulicatella elegans		Proteus mirabilis		Peptoniphilus sp. HMT 386		Staphylococcus epidermidis	module_87	Peptostreptococcaceae [G-9] [Eubacterium] brachy	module_80
Streptococcus agalactiae		Treponema vincentii		Pseudomonas aeruginosa		Lachnoanaerobaculum umeaense		Cupriavidus gilardii	module_88	Acidovorax caeni	module_81
Streptococcus salivarius		Pyramidobacter piscolens		Pseudomonas stutzeri		Cryptobacterium curtum		Ralstonia pickettii	module_88	Schlegelella thermodepolymerans	module_81
Lactobacillus crispatus		Jonquetella anthropi		Staphylococcus aureus		Enterobacter cancerogenus		Neisseria subflava	module_89	Kingella oralis	module_82
Bifidobacterium dentium		Selenomonas flueggei		Staphylococcus epidermidis		Lactococcus lactis		Neisseria perflava	module_89	Schaalia sp. HMT 180	module_82
Schaalia odontolytica		Phocaeicola abscessus		Streptococcus agalactiae		Eggerthella lenta		Corynebacterium matruchotii		Porphyromonas catoniae	module_83
Peptostreptococcus stomatis		Schaalia sp. HMT 180		Streptococcus pyogenes		Limosilactobacillus fermentum		Eikenella corrodens		Leptotrichia sp. HMT 212	module_83
Brucella anthropi		Simonsiella muelleri		Lactobacillus crispatus		Gardnerella vaginalis		Peptostreptococcaceae [G-5] [Eubacterium] saphenum		Anaeroglobus geminatus	module_84
Peptoniphilus sp. HMT 386		Scardovia inopinata		Bifidobacterium dentium		Selenomonas noxia		Filifactor alocis		Peptostreptococcaceae [G-1] [Eubacterium] infirmum	module_84
Lachnoanaerobaculum umeaense		Parascardovia denticolens		Peptostreptococcus stomatis		Kingella oralis		Mesorhizobium japonicum		Bacteroides heparinolyticus	module_85
Cryptobacterium curtum		Prevotella oris		Variovorax paradoxus		Abiotrophia defectiva		Lactobacillus johnsonii		Fretibacterium fastidiosum	module_85
Enterobacter cancerogenus		Paenibacillus phoenicis		Delftia acidovorans		Selenomonas sputigena		Haemophilus ducreyi		Solobacterium moorei	module_86
Lactococcus lactis		Peptidiphaga gingivicola		Bacteroidales [G-2] bacterium HMT 274		Slackia exigua		Olsenella uli		Actinomyces sp. HMT 897	module_86
Eggerthella lenta		Schaalia sp. HMT 178		Brucella anthropi		Pseudoleptotrichia goodfellowii		Mycobacterium tuberculosis		Fusobacterium nucleatum subsp. vincentii	module_87
Limosilactobacillus fermentum		Schaalia cardiffensis		Peptoniphilus sp. HMT 386		Oribacterium sp. HMT 078		Porphyromonas endodontalis		Fusobacterium nucleatum subsp. nucleatum	module_87
Gardnerella vaginalis		Actinomyces johnsonii		Cryptobacterium curtum		Cardiobacterium hominis		Mycobacterium leprae		Corynebacterium urealyticum	module_88
Kingella oralis		Olsenella sp. HMT 809		Enterobacter cancerogenus		Granulicatella adiacens		Rothia mucilaginosa		Cellulosimicrobium cellulans	module_88
Abiotrophia defectiva		Johnsonella ignava		Lactococcus lactis		Oribacterium sinus		Shuttleworthia satelles		Kocuria rhizophila	module_89
Catonella morbi		Selenomonas infelix		Eggerthella lenta		Granulicatella elegans		Yersinia pestis		Dermabacter hominis	module_89
Selenomonas sputigena		Fretibacterium fastidiosum		Limosilactobacillus fermentum		Pyramidobacter piscolens		Treponema denticola		Treponema maltophilum	module_90
Slackia exigua		Arachnia propionica		Campylobacter rectus		Jonquetella anthropi		Treponema pallidum		Treponema socranskii	module_90
Pseudoleptotrichia goodfellowii		Megasphaera micronuciformis		Gardnerella vaginalis		Leptotrichia wadei		Porphyromonas gingivalis		Johnsonella ignava	module_91
Capnocytophaga gingivalis		Rothia aeria		Selenomonas noxia		Finegoldia magna		Streptococcus mutans		Prevotella intermedia	module_91
Oribacterium sp. HMT 078		Prevotella oulorum		Kingella oralis		Phocaeicola abscessus		Tannerella forsythia		Peptoniphilus harei	module_92
Cardiobacterium hominis		Peptostreptococcaceae [G-1] [Eubacterium] infirmum		Abiotrophia defectiva		Schaalia sp. HMT 180		Lactobacillus acidophilus		Finegoldia magna	module_92
Treponema vincentii		Selenomonas artemidis		Catonella morbi		Simonsiella muelleri		Aggregatibacter actinomycetemcomitans		Enterococcus italicus	module_93
Pyramidobacter piscolens		Veillonella rogosae		Alloprevotella tannerae		Scardovia inopinata		Anaerococcus prevotii		Enterococcus saccharolyticus	module_93
Jonquetella anthropi		Streptococcus intermedius		Selenomonas sputigena		Parascardovia denticolens		Lancefieldella parvula		Neisseria bacilliformis	module_94
Finegoldia magna		Mycoplasma hominis		Slackia exigua		Paenibacillus phoenicis		Bordetella pertussis		Kingella kingae	module_94
Phocaeicola abscessus		Anaerococcus tetradius		Pseudoleptotrichia goodfellowii		Peptidiphaga gingivicola		Mitsuokella multacida		Erythrobacter tepidarius	module_95
Schaalia sp. HMT 180		Bulleidia extructa		Capnocytophaga gingivalis		Schaalia cardiffensis		Limosilactobacillus reuteri		Roseomonas mucosa	module_95
Simonsiella muelleri		Campylobacter showae		Oribacterium sp. HMT 078		Actinomyces johnsonii		Moraxella catarrhalis		Streptococcus constellatus	module_96
Capnocytophaga granulosa		Limosilactobacillus vaginalis		Cardiobacterium hominis		Olsenella sp. HMT 809		Escherichia coli		Streptococcus intermedius	module_96
Scardovia inopinata		Mobiluncus mulieris		Granulicatella adiacens		Johnsonella ignava		Campylobacter concisus		Lachnoanaerobaculum saburreum	module_97
Parascardovia denticolens		Porphyromonas uenonis		Oribacterium sinus		Selenomonas infelix		Chlamydia pneumoniae		Prevotella sp. HMT 317	module_97
Paenibacillus phoenicis		Prevotella buccae		Granulicatella elegans		Fretibacterium fastidiosum		Corynebacterium diphtheriae		Neisseria sp. HMT 020	module_98
Neisseria oralis		Prevotella buccalis		Treponema vincentii		Prevotella denticola		Cronobacter sakazakii		Neisseria elongata	module_98
Peptidiphaga gingivicola		Staphylococcus warneri		Pyramidobacter piscolens		Arachnia propionica		Arcanobacterium haemolyticum		Saccharibacteria_(TM7)_[G-1] bacterium_HMT_349	module_99
Schaalia cardiffensis		Streptococcus downei		Jonquetella anthropi		Peptoniphilus lacrimalis		Lactobacillus gasseri		Desulfobulbus sp. HMT 041	module_99
Olsenella sp. HMT 809		Streptococcus sp. HMT 056		Schaalia sp. HMT 180		Solobacterium moorei		Ligilactobacillus salivarius		Streptococcus cristatus	module_100
Johnsonella ignava		Scardovia wiggsiae		Scardovia inopinata		Capnocytophaga leadbetteri		Mycoplasmopsis fermentans		Streptococcus sinensis	module_100
Fretibacterium fastidiosum		Limosilactobacillus oris		Parascardovia denticolens		Megasphaera micronuciformis		Mycoplasma genitalium		Treponema lecithinolyticum	module_101
Arachnia propionica		Selenomonas sp. HMT 137		Paenibacillus phoenicis		Capnocytophaga sp. HMT 338		Proteus mirabilis		Schaalia georgiae	module_101
Solobacterium moorei		Veillonella sp. HMT 780		Peptidiphaga gingivicola		Rothia aeria		Streptococcus agalactiae		Selenomonas sp. HMT 137	module_102
Megasphaera micronuciformis		Cardiobacterium valvarum		Schaalia cardiffensis		Prevotella oulorum		Bifidobacterium dentium		Selenomonas sp. HMT 133	module_102
Capnocytophaga sp. HMT 338		Lentilactobacillus kisonensis		Actinomyces johnsonii		Streptococcus anginosus		Schaalia odontolytica		Rothia dentocariosa	module_103
Rothia aeria		Lentilactobacillus parafarraginis		Olsenella sp. HMT 809		Actinomyces sp. HMT 448		Bacteroidales [G-2] bacterium HMT 274		Cutibacterium acnes	module_103
Selenomonas artemidis		Prevotella micans		Fretibacterium fastidiosum		Anaerococcus tetradius		Brucella anthropi		Capnocytophaga leadbetteri	module_104
Veillonella rogosae		Anaeroglobus geminatus		Parvimonas sp. HMT 110		Bulleidia extructa		Lachnoanaerobaculum umeaense		Capnocytophaga sp. HMT 332	module_104
Actinomyces sp. HMT 448		Lachnoanaerobaculum orale		Arachnia propionica		Lactobacillus iners		Cryptobacterium curtum		Veillonella rogosae	module_105
Mycoplasma hominis		Selenomonas sp. HMT 133		Solobacterium moorei		Limosilactobacillus vaginalis		Enterobacter cancerogenus		Veillonella atypica	module_105
Anaerococcus tetradius		Brevundimonas diminuta		Capnocytophaga leadbetteri		Mobiluncus mulieris		Lactococcus lactis		Treponema pectinovorum	module_106
Bulleidia extructa		Peptostreptococcus anaerobius		Megasphaera micronuciformis		Porphyromonas uenonis		Eggerthella lenta		Fusobacterium periodonticum	module_106
Campylobacter showae		Corynebacterium durum		Rothia aeria		Staphylococcus warneri		Limosilactobacillus fermentum		Microbacterium flavescens	module_107
Lactobacillus iners		Alloprevotella sp. HMT 473		Streptococcus anginosus		Streptococcus downei		Gardnerella vaginalis		Microbacterium ginsengisoli	module_107
Limosilactobacillus vaginalis		Schaalia georgiae		Peptostreptococcaceae [G-1] [Eubacterium] infirmum		Acidipropionibacterium acidifaciens		Selenomonas noxia		Lactobacillus gasseri	module_108
Mobiluncus mulieris		Actinomyces massiliensis		Actinomyces sp. HMT 448		Scardovia wiggsiae		Kingella oralis		Lactobacillus johnsonii	module_108
Porphyromonas uenonis		Peptostreptococcaceae [G-7] [Eubacterium] yurii subsps. yurii &#38; margaretiae		Mycoplasma hominis		Oribacterium asaccharolyticum		Abiotrophia defectiva		Helicobacter pylori	module_109
Prevotella buccalis		Lysinibacillus fusiformis		Anaerococcus tetradius		Peptoniphilus sp. HMT 375		Alloprevotella tannerae		Campylobacter ureolyticus	module_109
Staphylococcus warneri		Limosilactobacillus coleohominis		Bulleidia extructa		Limosilactobacillus oris		Selenomonas sputigena		Corynebacterium matruchotii
Streptococcus downei		Rothia dentocariosa		Campylobacter showae		Cardiobacterium valvarum		Slackia exigua		Eikenella corrodens
Acidipropionibacterium acidifaciens		Achromobacter xylosoxidans		Limosilactobacillus vaginalis		Lentilactobacillus kisonensis		Pseudoleptotrichia goodfellowii		Peptostreptococcaceae [G-5] [Eubacterium] saphenum
Prevotella histicola		Eubacterium limosum		Mobiluncus mulieris		Lentilactobacillus parafarraginis		Oribacterium sp. HMT 078		Filifactor alocis
Scardovia wiggsiae		Olsenella profusa		Prevotella buccae		Anaeroglobus geminatus		Granulicatella adiacens		Gemella haemolysans
Peptoniphilus sp. HMT 375		Prevotella baroniae		Staphylococcus warneri		Lachnoanaerobaculum orale		Oribacterium sinus		Mycobacterium tuberculosis
Limosilactobacillus oris		Prevotella pleuritidis		Streptococcus downei		Fusobacterium nucleatum subsp. animalis		Granulicatella elegans		Porphyromonas endodontalis
Parvimonas sp. HMT 393		Treponema medium		Haemophilus haemolyticus		Selenomonas sp. HMT 133		Treponema vincentii		Mycobacterium leprae
Selenomonas sp. HMT 137		Treponema maltophilum		Acidipropionibacterium acidifaciens		Brevundimonas diminuta		Pyramidobacter piscolens		Rothia mucilaginosa
Veillonella sp. HMT 780		Treponema socranskii		Scardovia wiggsiae		Peptostreptococcus anaerobius		Jonquetella anthropi		Treponema denticola
Cardiobacterium valvarum		Prevotella saccharolytica		Limosilactobacillus oris		Corynebacterium durum		Finegoldia magna		Treponema pallidum
Lentilactobacillus kisonensis		Schaalia lingnae		Cardiobacterium valvarum		Alloprevotella sp. HMT 473		Schaalia sp. HMT 180		Porphyromonas gingivalis
Lentilactobacillus parafarraginis		Lancefieldella sp. HMT 199		Lentilactobacillus kisonensis		Schaalia georgiae		Simonsiella muelleri		Streptococcus mutans
Prevotella micans		Selenomonas sp. HMT 138		Lentilactobacillus parafarraginis		Porphyromonas pasteri		Scardovia inopinata		Streptococcus sanguinis
Anaeroglobus geminatus		Centipeda periodontii		Anaeroglobus geminatus		Peptostreptococcaceae [G-7] [Eubacterium] yurii subsps. yurii &#38; margaretiae		Parascardovia denticolens		Aggregatibacter actinomycetemcomitans
Lachnoanaerobaculum orale		Enterobacter hormaechei		Fusobacterium nucleatum subsp. animalis		Lysinibacillus fusiformis		Paenibacillus phoenicis		Anaerococcus prevotii
Fusobacterium nucleatum subsp. animalis		Lactiplantibacillus plantarum		Selenomonas sp. HMT 133		Limosilactobacillus coleohominis		Peptidiphaga gingivicola		Lancefieldella parvula
Selenomonas sp. HMT 133		Lautropia mirabilis		Brevundimonas diminuta		Rothia dentocariosa		Schaalia cardiffensis		Mitsuokella multacida
Peptostreptococcus anaerobius		Neisseria bacilliformis		Peptostreptococcus anaerobius		Eubacterium limosum		Actinomyces johnsonii		Moraxella catarrhalis
Corynebacterium durum		Microbacterium flavescens		Corynebacterium durum		Prevotella salivae		Olsenella sp. HMT 809		Dialister invisus
Alloprevotella sp. HMT 473		Propionibacteriaceae [G-2] bacterium HMT 192		Schaalia georgiae		Olsenella profusa		Johnsonella ignava		Campylobacter concisus
Actinomyces massiliensis		Peptoniphilus indolicus		Actinomyces massiliensis		Porphyromonas catoniae		Fretibacterium fastidiosum		Campylobacter curvus
Porphyromonas pasteri		Corynebacterium urealyticum		Peptostreptococcaceae [G-7] [Eubacterium] yurii subsps. yurii &#38; margaretiae		Treponema medium		Arachnia propionica		Chlamydia pneumoniae
Peptostreptococcaceae [G-7] [Eubacterium] yurii subsps. yurii &#38; margaretiae		Kytococcus sedentarius		Veillonella atypica		Schaalia lingnae		Peptoniphilus lacrimalis		Corynebacterium diphtheriae
Veillonella atypica		Sanguibacter keddieii		Lysinibacillus fusiformis		Lancefieldella sp. HMT 199		Rothia aeria		Arcanobacterium haemolyticum
Limosilactobacillus coleohominis		Comamonas testosteroni		Limosilactobacillus coleohominis		Selenomonas sp. HMT 138		Streptococcus anginosus		Ligilactobacillus salivarius
Streptococcus infantis		Fusobacterium gonidiaformans		Rothia dentocariosa		Bifidobacterium longum		Actinomyces sp. HMT 448		Mycoplasmopsis fermentans
Rothia dentocariosa		Prevotella multisaccharivorax		Achromobacter xylosoxidans		Dialister micraerophilus		Anaerococcus tetradius		Mycoplasma genitalium
Eubacterium limosum		Prevotella oralis		Eubacterium limosum		Enterobacter hormaechei		Bulleidia extructa		Mycoplasma pneumoniae
Olsenella profusa		Cutibacterium avidum		Olsenella profusa		Haemophilus aegyptius		Limosilactobacillus vaginalis		Proteus mirabilis
Prevotella baroniae		Pseudoramibacter alactolyticus		Porphyromonas catoniae		Lactiplantibacillus plantarum		Mobiluncus mulieris		Staphylococcus epidermidis
Porphyromonas catoniae		Streptococcus cristatus		Treponema medium		Lautropia mirabilis		Porphyromonas uenonis		Streptococcus agalactiae
Capnocytophaga sp. HMT 332		Prevotella dentalis		Treponema maltophilum		Neisseria bacilliformis		Staphylococcus warneri		Streptococcus pyogenes
Treponema medium		Actinomyces graevenitzii		Treponema socranskii		Microbacterium flavescens		Streptococcus downei		Bifidobacterium dentium
Treponema maltophilum		Dolosigranulum pigrum		Schaalia lingnae		Propionibacteriaceae [G-2] bacterium HMT 192		Acidipropionibacterium acidifaciens		Schaalia odontolytica
Treponema socranskii		Fusobacterium necrophorum		Bifidobacterium longum		Peptoniphilus indolicus		Scardovia wiggsiae		Prevotella nanceiensis
Neisseria sp. HMT 020		Gemella sanguinis		Enterobacter hormaechei		Corynebacterium urealyticum		Oribacterium asaccharolyticum		Brucella anthropi
Schaalia lingnae		Kingella kingae		Lactiplantibacillus plantarum		Kytococcus sedentarius		Limosilactobacillus oris		Cryptobacterium curtum
Lancefieldella sp. HMT 199		Porphyromonas asaccharolytica		Lautropia mirabilis		Sanguibacter keddieii		Veillonella sp. HMT 780		Eggerthella lenta
Bifidobacterium longum		Prevotella maculosa		Neisseria bacilliformis		Comamonas testosteroni		Cardiobacterium valvarum		Gardnerella vaginalis
Centipeda periodontii		Staphylococcus caprae		Propionibacteriaceae [G-2] bacterium HMT 192		Anaerococcus lactolyticus		Lentilactobacillus kisonensis		Selenomonas noxia
Dialister micraerophilus		Streptococcus sobrinus		Peptoniphilus indolicus		Fusobacterium gonidiaformans		Lentilactobacillus parafarraginis		Abiotrophia defectiva
Enterobacter hormaechei		Gemella morbillorum		Corynebacterium urealyticum		Prevotella multiformis		Anaeroglobus geminatus		Slackia exigua
Haemophilus aegyptius		Peptidiphaga sp. HMT 183		Ralstonia pickettii		Prevotella multisaccharivorax		Fusobacterium nucleatum subsp. animalis		Pseudoleptotrichia goodfellowii
Lautropia mirabilis		Schaalia sp. HMT 877		Kytococcus sedentarius		Prevotella oralis		Selenomonas sp. HMT 133		Capnocytophaga gingivalis
Neisseria bacilliformis		Bradyrhizobium elkanii		Sanguibacter keddieii		Cutibacterium avidum		Peptostreptococcus anaerobius		Oribacterium sp. HMT 078
Microbacterium flavescens		Neisseria weaveri		Comamonas testosteroni		Pseudoramibacter alactolyticus		Corynebacterium durum		Cardiobacterium hominis
Propionibacteriaceae [G-2] bacterium HMT 192		Porphyromonas sp. HMT 278		Fusobacterium gonidiaformans		Streptococcus australis		Alloprevotella sp. HMT 473		Granulicatella adiacens
Peptoniphilus indolicus		Actinomyces naeslundii		Prevotella multisaccharivorax		Actinomyces graevenitzii		Schaalia georgiae		Oribacterium sinus
Kytococcus sedentarius		Corynebacterium otitidis		Cutibacterium avidum		Dolosigranulum pigrum		Actinomyces massiliensis		Granulicatella elegans
Sanguibacter keddieii		Burkholderia cepacia		Pseudoramibacter alactolyticus		Fusobacterium necrophorum		Porphyromonas pasteri		Pyramidobacter piscolens
Anaerococcus lactolyticus		Afipia broomeae		Streptococcus australis		Gemella sanguinis		Peptostreptococcaceae [G-7] [Eubacterium] yurii subsps. yurii &#38; margaretiae		Jonquetella anthropi
Fusobacterium gonidiaformans		Alloiococcus otitis		Actinomyces graevenitzii		Kingella denitrificans		Veillonella atypica		Simonsiella muelleri
Prevotella multisaccharivorax		Bifidobacterium breve		Dolosigranulum pigrum		Kingella kingae		Lysinibacillus fusiformis		Scardovia inopinata
Prevotella oralis		Lactiplantibacillus pentosus		Fusobacterium necrophorum		Porphyromonas asaccharolytica		Limosilactobacillus coleohominis		Parascardovia denticolens
Pseudoramibacter alactolyticus		Schaalia sp. HMT 172		Gemella sanguinis		Staphylococcus caprae		Rothia dentocariosa		Paenibacillus phoenicis
Streptococcus australis		Campylobacter gracilis		Kingella kingae		Streptococcus sobrinus		Eubacterium limosum		Peptidiphaga gingivicola
Prevotella dentalis		Peptoniphilaceae [G-1] bacterium HMT 113		Porphyromonas asaccharolytica		Gemella morbillorum		Olsenella profusa		Schaalia cardiffensis
Actinomyces graevenitzii		Leptotrichia sp. HMT 215		Staphylococcus caprae		Peptidiphaga sp. HMT 183		Prevotella pleuritidis		Actinomyces johnsonii
Dolosigranulum pigrum		Aggregatibacter sp. HMT 458		Streptococcus sobrinus		Bradyrhizobium elkanii		Porphyromonas catoniae		Olsenella sp. HMT 809
Fusobacterium necrophorum		Mitsuokella sp. HMT 131		Gemella morbillorum		Neisseria weaveri		Treponema maltophilum		Parvimonas sp. HMT 110
Kingella denitrificans		Alloscardovia omnicolens		Peptidiphaga sp. HMT 183		Corynebacterium otitidis		Treponema socranskii		Prevotella denticola
Kingella kingae		Bacteroides pyogenes		Bradyrhizobium elkanii		Burkholderia cepacia		Lancefieldella sp. HMT 199		Arachnia propionica
Porphyromonas asaccharolytica		Selenomonas sp. HMT 892		Actinomyces naeslundii		Afipia broomeae		Bifidobacterium longum		Megasphaera micronuciformis
Staphylococcus caprae		Olegusella massiliensis		Corynebacterium otitidis		Alloiococcus otitis		Dialister micraerophilus		Capnocytophaga sp. HMT 338
Streptococcus sobrinus		Clostridiales [F-3][G-1] bacterium HMT 876		Burkholderia cepacia		Bifidobacterium breve		Enterobacter hormaechei		Rothia aeria
Peptidiphaga sp. HMT 183		Treponema lecithinolyticum		Afipia broomeae		Lentilactobacillus buchneri		Microbacterium flavescens		Streptococcus anginosus
Capnocytophaga sp. HMT 863		Bifidobacterium animalis		Alloiococcus otitis		Lactiplantibacillus pentosus		Propionibacteriaceae [G-2] bacterium HMT 192		Selenomonas artemidis
Bradyrhizobium elkanii		Eggerthia catenaformis		Bifidobacterium breve		Schaalia sp. HMT 172		Peptoniphilus indolicus		Actinomyces sp. HMT 448
Neisseria weaveri		Atopobium minutum		Lentilactobacillus buchneri		Campylobacter gracilis		Corynebacterium urealyticum		Mycoplasma hominis
Leptotrichia sp. HMT 879		Desulfobulbus sp. HMT 041		Lactiplantibacillus pentosus		Peptoniphilaceae [G-1] bacterium HMT 113		Kytococcus sedentarius		Anaerococcus tetradius
Corynebacterium otitidis		Erysipelothrix tonsillarum		Campylobacter gracilis		Leptotrichia sp. HMT 215		Sanguibacter keddieii		Bulleidia extructa
Burkholderia cepacia		Leptotrichia shahii		Peptoniphilaceae [G-1] bacterium HMT 113		Mitsuokella sp. HMT 131		Fusobacterium gonidiaformans		Lactobacillus iners
Afipia broomeae		Mycoplasma orale		Mitsuokella sp. HMT 131		Bacteroides pyogenes		Prevotella multiformis		Mobiluncus mulieris
Alloiococcus otitis		Actinomyces dentalis		Alloscardovia omnicolens		Olegusella massiliensis		Cutibacterium avidum		Porphyromonas uenonis
Bifidobacterium breve		Actinomyces gerencseriae		Leptotrichia sp. HMT 225		Clostridiales [F-3][G-1] bacterium HMT 876		Pseudoramibacter alactolyticus		Staphylococcus warneri
Lentilactobacillus buchneri		Actinomyces timonensis		Bacteroides pyogenes		Gemella bergeri		Prevotella dentalis		Streptococcus downei
Lactiplantibacillus pentosus		Mycoplasma salivarium		Selenomonas sp. HMT 892		Treponema lecithinolyticum		Fusobacterium necrophorum		Acidipropionibacterium acidifaciens
Schaalia sp. HMT 172		Campylobacter ureolyticus		Olegusella massiliensis		Bifidobacterium animalis		Kingella kingae		Scardovia wiggsiae
Campylobacter gracilis		Absconditabacteria (SR1) [G-1] bacterium HMT 874		Clostridiales [F-3][G-1] bacterium HMT 876		Stomatobaculum longum		Porphyromonas asaccharolytica		Oribacterium asaccharolyticum
Peptoniphilaceae [G-1] bacterium HMT 113		Mogibacterium timidum		Gemella bergeri		Atopobium minutum		Staphylococcus caprae		Peptoniphilus sp. HMT 375
Leptotrichia sp. HMT 215		Tannerella sp. HMT 286		Treponema lecithinolyticum		Desulfobulbus sp. HMT 041		Streptococcus sobrinus		Veillonella sp. HMT 780
Mitsuokella sp. HMT 131		Anaerolineae [G-1] bacterium HMT 439		Bifidobacterium animalis		Erysipelothrix tonsillarum		Gemella morbillorum		Lentilactobacillus kisonensis
Alloscardovia omnicolens		Bartonella schoenbuchensis		Atopobium minutum		Leptotrichia shahii		Peptidiphaga sp. HMT 183		Prevotella micans
Bacteroides pyogenes		Mycolicibacterium neoaurum		Desulfobulbus sp. HMT 041		Mycoplasma orale		Neisseria weaveri		Lachnoanaerobaculum orale
Olegusella massiliensis		Prevotella shahii		Erysipelothrix tonsillarum		Actinomyces gerencseriae		Corynebacterium otitidis		Fusobacterium nucleatum subsp. animalis
Clostridiales [F-3][G-1] bacterium HMT 876		Pseudomonas otitidis		Leptotrichia shahii		Bifidobacterium subtile		Afipia broomeae		Corynebacterium durum
Gemella bergeri		Actinomyces israelii		Mycoplasma orale		Actinomyces timonensis		Bifidobacterium breve		Alloprevotella sp. HMT 473
Treponema lecithinolyticum		Bifidobacterium scardovii		Actinomyces dentalis		Mycoplasma salivarium		Lactiplantibacillus pentosus		Actinomyces massiliensis
Bifidobacterium animalis		Kluyvera ascorbata		Actinomyces gerencseriae		Absconditabacteria (SR1) [G-1] bacterium HMT 874		Schaalia sp. HMT 172		Peptostreptococcaceae [G-7] [Eubacterium] yurii subsps. yurii &#38; margaretiae
Eggerthia catenaformis		Anaerolinea thermophila		Bifidobacterium subtile		Anaerolineae [G-1] bacterium HMT 439		Campylobacter gracilis		Lysinibacillus fusiformis
Stomatobaculum longum		Caldilinea aerophila		Actinomyces timonensis		Bartonella schoenbuchensis		Leptotrichia sp. HMT 215		Limosilactobacillus coleohominis
Atopobium minutum		Chlorobium limicola		Mycoplasma salivarium		Mycolicibacterium neoaurum		Aggregatibacter sp. HMT 458		Eubacterium limosum
Desulfobulbus sp. HMT 041		Ignavibacterium album		Campylobacter ureolyticus		Prevotella shahii		Mitsuokella sp. HMT 131		Prevotella salivae
Erysipelothrix tonsillarum		Melioribacter roseus		Absconditabacteria (SR1) [G-1] bacterium HMT 874		Pseudomonas otitidis		Alloscardovia omnicolens		Olsenella profusa
Mycoplasma orale		Candidatus Saccharimonas aalborgensis		Mogibacterium timidum		Actinomyces israelii		Bacteroides pyogenes		Bifidobacterium longum
Actinomyces gerencseriae		Saccharibacteria (TM7) [G-7] bacterium HMT 987		Tannerella sp. HMT 286		Bifidobacterium scardovii		Olegusella massiliensis		Dialister micraerophilus
Bifidobacterium subtile		Saccharibacteria (TM7) [G-7] bacterium HMT 986		Anaerolineae [G-1] bacterium HMT 439		Kluyvera ascorbata		Clostridiales [F-3][G-1] bacterium HMT 876		Enterobacter hormaechei
Actinomyces timonensis		Gracilibacteria_(GN02)_[G-3] bacterium_HMT_996		Bartonella schoenbuchensis		Anaerolinea thermophila		Gemella bergeri		Lautropia mirabilis
Mycoplasma salivarium		Gracilibacteria (GN02) [G-4] bacterium HMT 997		Mycolicibacterium neoaurum		Caldilinea aerophila		Treponema lecithinolyticum		Propionibacteriaceae [G-2] bacterium HMT 192
Absconditabacteria (SR1) [G-1] bacterium HMT 874		Saccharibacteria (TM7) [G-7] bacterium HMT 989		Prevotella shahii		Chlorobium limicola		Bifidobacterium animalis		Peptoniphilus indolicus
Mogibacterium timidum		Schaalia meyeri		Pseudomonas otitidis		Melioribacter roseus		Atopobium minutum		Sanguibacter keddieii
Tannerella sp. HMT 286		Peptostreptococcaceae [G-1] [Eubacterium] sulci		Actinomyces israelii		Candidatus Saccharimonas aalborgensis		Desulfobulbus sp. HMT 041		Fusobacterium gonidiaformans
Anaerolineae [G-1] bacterium HMT 439		Actinomyces sp. HMT 414		Bifidobacterium scardovii		Saccharibacteria (TM7) [G-7] bacterium HMT 987		Erysipelothrix tonsillarum		Cutibacterium avidum
Bartonella schoenbuchensis		Arsenicicoccus bolidensis		Kluyvera ascorbata		Saccharibacteria (TM7) [G-7] bacterium HMT 986		Leptotrichia shahii		Pseudoramibacter alactolyticus
Mycolicibacterium neoaurum		Leptotrichia sp. HMT 212		Caldilinea aerophila		Gracilibacteria_(GN02)_[G-3] bacterium_HMT_996		Mycoplasma orale		Actinomyces graevenitzii
Prevotella fusca		Ottowia sp. HMT 894		Chlorobium limicola		Gracilibacteria (GN02) [G-4] bacterium HMT 997		Actinomyces gerencseriae		Fusobacterium necrophorum
Prevotella shahii		Olsenella sp. HMT 807		Ignavibacterium album		Saccharibacteria (TM7) [G-7] bacterium HMT 989		Bifidobacterium subtile		Gemella sanguinis
Pseudomonas otitidis		Lachnoanaerobaculum saburreum		Melioribacter roseus		Schaalia meyeri		Actinomyces timonensis		Kingella denitrificans
Actinomyces israelii		Treponema putidum		Candidatus Saccharimonas aalborgensis		Peptostreptococcaceae [G-1] [Eubacterium] sulci		Mycoplasma salivarium		Porphyromonas asaccharolytica
Bifidobacterium scardovii		Haemophilus parahaemolyticus		Saccharibacteria (TM7) [G-7] bacterium HMT 987		Arsenicicoccus bolidensis		Campylobacter ureolyticus		Staphylococcus caprae
Kluyvera ascorbata		Haemophilus sputorum		Saccharibacteria (TM7) [G-7] bacterium HMT 986		Leptotrichia sp. HMT 212		Anaerolineae [G-1] bacterium HMT 439		Gemella morbillorum
Anaerolinea thermophila		Actinomyces radicidentis		Gracilibacteria_(GN02)_[G-3] bacterium_HMT_996		Ottowia sp. HMT 894		Bartonella schoenbuchensis		Peptidiphaga sp. HMT 183
Caldilinea aerophila		Corynebacterium tuscaniense		Gracilibacteria (GN02) [G-4] bacterium HMT 997		Olsenella sp. HMT 807		Mycolicibacterium neoaurum		Bradyrhizobium elkanii
Chlorobium limicola		Microbacterium ginsengisoli		Saccharibacteria (TM7) [G-7] bacterium HMT 989		Lachnoanaerobaculum saburreum		Pseudomonas otitidis		Neisseria weaveri
Ignavibacterium album		Peptostreptococcaceae [G-9] [Eubacterium] brachy		Schaalia meyeri		Treponema putidum		Actinomyces israelii		Actinomyces naeslundii
Melioribacter roseus		Capnocytophaga haemolytica		Peptostreptococcaceae [G-1] [Eubacterium] sulci		Haemophilus parahaemolyticus		Bifidobacterium scardovii		Corynebacterium otitidis
Candidatus Saccharimonas aalborgensis		Peptostreptococcaceae [G-6] [Eubacterium] nodatum		Actinomyces sp. HMT 414		Oribacterium parvum		Kluyvera ascorbata		Afipia broomeae
Saccharibacteria (TM7) [G-7] bacterium HMT 987		Leptotrichia sp. HMT 847		Arsenicicoccus bolidensis		Actinomyces radicidentis		Anaerolinea thermophila		Alloiococcus otitis
Saccharibacteria (TM7) [G-7] bacterium HMT 986		Desulfomicrobium orale		Ottowia sp. HMT 894		Gemella sp. HMT 928		Caldilinea aerophila		Bifidobacterium breve
Gracilibacteria_(GN02)_[G-3] bacterium_HMT_996		Saccharibacteria (TM7) [G-1] bacterium HMT 952		Olsenella sp. HMT 807		Corynebacterium tuscaniense		Chlorobium limicola		Lactiplantibacillus pentosus
Gracilibacteria (GN02) [G-4] bacterium HMT 997		Selenomonas sp. HMT 126		Lachnoanaerobaculum saburreum		Microbacterium ginsengisoli		Candidatus Saccharimonas aalborgensis		Campylobacter gracilis
Saccharibacteria (TM7) [G-7] bacterium HMT 989		Cutibacterium sp. HMT 193		Treponema putidum		Peptostreptococcaceae [G-9] [Eubacterium] brachy		Saccharibacteria (TM7) [G-7] bacterium HMT 987		Leptotrichia sp. HMT 215
Schaalia meyeri		Lentilactobacillus rapi		Haemophilus parahaemolyticus		Capnocytophaga haemolytica		Saccharibacteria (TM7) [G-7] bacterium HMT 986		Mitsuokella sp. HMT 131
Peptostreptococcaceae [G-1] [Eubacterium] sulci		Fusobacterium nucleatum		Actinomyces radicidentis		Leptotrichia sp. HMT 847		Gracilibacteria_(GN02)_[G-3] bacterium_HMT_996		Alloscardovia omnicolens
Arsenicicoccus bolidensis		Corynebacterium singulare		Gemella sp. HMT 928		Desulfomicrobium orale		Saccharibacteria (TM7) [G-7] bacterium HMT 989		Olegusella massiliensis
Ottowia sp. HMT 894		Klebsiella aerogenes		Corynebacterium tuscaniense		Saccharibacteria (TM7) [G-1] bacterium HMT 952		Schaalia meyeri		Clostridiales [F-3][G-1] bacterium HMT 876
Olsenella sp. HMT 807		Micavibrio aeruginosavorus		Peptostreptococcaceae [G-9] [Eubacterium] brachy		Cutibacterium sp. HMT 193		Peptostreptococcaceae [G-1] [Eubacterium] sulci		Gemella bergeri
Treponema putidum		Staphylococcus pasteuri		Leptotrichia sp. HMT 847		Lentilactobacillus rapi		Arsenicicoccus bolidensis		Stomatobaculum longum
Haemophilus parahaemolyticus		Corynebacterium gottingense		Desulfomicrobium orale		Corynebacterium singulare		Ottowia sp. HMT 894		Atopobium minutum
Haemophilus sputorum		Lactobacillus ultunensis		Moraxella osloensis		Klebsiella aerogenes		Lachnoanaerobaculum saburreum		Erysipelothrix tonsillarum
Actinomyces radicidentis		Dialister pneumosintes		Cutibacterium sp. HMT 193		Micavibrio aeruginosavorus		Treponema putidum		Mycoplasma orale
Gemella sp. HMT 928		Arthrospira platensis		Lentilactobacillus rapi		Staphylococcus pasteuri		Haemophilus parahaemolyticus		Actinomyces gerencseriae
Corynebacterium tuscaniense		Mogibacterium pumilum		Enhydrobacter aerosaccus		Anoxybacillus flavithermus		Oribacterium parvum		Bifidobacterium subtile
Microbacterium ginsengisoli		Corynebacterium striatum		Corynebacterium singulare		Corynebacterium gottingense		Sneathia vaginalis		Actinomyces timonensis
Peptostreptococcaceae [G-9] [Eubacterium] brachy		Staphylococcus cohnii		Klebsiella aerogenes		Lactobacillus ultunensis		Actinomyces radicidentis		Mycoplasma salivarium
Capnocytophaga haemolytica		Kocuria palustris		Micavibrio aeruginosavorus		Dialister pneumosintes		Gemella sp. HMT 928		Absconditabacteria (SR1) [G-1] bacterium HMT 874
Peptostreptococcaceae [G-6] [Eubacterium] nodatum		Corynebacterium kroppenstedtii		Staphylococcus pasteuri		Arthrospira platensis		Corynebacterium tuscaniense		Tannerella sp. HMT 286
Desulfomicrobium orale		Acidovorax ebreus		Anoxybacillus flavithermus		Mogibacterium pumilum		Microbacterium ginsengisoli		Bartonella schoenbuchensis
Lentilactobacillus rapi		Acinetobacter radioresistens		Corynebacterium gottingense		Corynebacterium striatum		Peptostreptococcaceae [G-9] [Eubacterium] brachy		Mycolicibacterium neoaurum
Corynebacterium singulare		Moraxella lincolnii		Lactobacillus ultunensis		Staphylococcus cohnii		Desulfomicrobium orale		Prevotella shahii
Klebsiella aerogenes		Kocuria rhizophila		Cupriavidus gilardii		Kocuria palustris		Cutibacterium sp. HMT 193		Actinomyces israelii
Micavibrio aeruginosavorus		Acinetobacter junii		Dialister pneumosintes		Corynebacterium kroppenstedtii		Corynebacterium singulare		Bifidobacterium scardovii
Staphylococcus pasteuri		Lawsonella clevelandensis		Arthrospira platensis		Acidovorax ebreus		Klebsiella aerogenes		Kluyvera ascorbata
Corynebacterium gottingense		Corynebacterium minutissimum		Mogibacterium pumilum		Acinetobacter radioresistens		Micavibrio aeruginosavorus		Anaerolinea thermophila
Lactobacillus ultunensis		Paenibacillus glucanolyticus		Corynebacterium striatum		Moraxella lincolnii		Corynebacterium gottingense		Caldilinea aerophila
Dialister pneumosintes		Staphylococcus capitis		Staphylococcus cohnii		Kocuria rhizophila		Lactobacillus ultunensis		Chlorobium limicola
Arthrospira platensis		Corynebacterium tuberculostearicum		Kocuria palustris		Acinetobacter junii		Dialister pneumosintes		Ignavibacterium album
Mogibacterium pumilum		Aerococcus viridans		Corynebacterium kroppenstedtii		Lawsonella clevelandensis		Arthrospira platensis		Melioribacter roseus
Staphylococcus cohnii		Janibacter indicus		Acidovorax ebreus		Corynebacterium minutissimum		Mogibacterium pumilum		Candidatus Saccharimonas aalborgensis
Kocuria palustris		Corynebacterium afermentans		Acinetobacter radioresistens		Paenibacillus glucanolyticus		Corynebacterium striatum		Saccharibacteria (TM7) [G-7] bacterium HMT 987
Corynebacterium kroppenstedtii		Dermabacter hominis		Haemophilus sp. HMT 036		Staphylococcus capitis		Staphylococcus cohnii		Saccharibacteria (TM7) [G-7] bacterium HMT 986
Acinetobacter radioresistens		Serratia marcescens		Moraxella lincolnii		Corynebacterium tuberculostearicum		Kocuria palustris		Gracilibacteria (GN02) [G-4] bacterium HMT 997
Haemophilus sp. HMT 036		Dietzia cinnamea		Kocuria rhizophila		Aerococcus viridans		Corynebacterium kroppenstedtii		Saccharibacteria (TM7) [G-7] bacterium HMT 989
Moraxella lincolnii		Acidovorax temperans		Acinetobacter junii		Acinetobacter lwoffii		Acinetobacter radioresistens		Peptostreptococcaceae [G-1] [Eubacterium] sulci
Kocuria rhizophila		Roseomonas mucosa		Lawsonella clevelandensis		Janibacter indicus		Moraxella lincolnii		Arsenicicoccus bolidensis
Lawsonella clevelandensis		Staphylococcus pettenkoferi		Corynebacterium minutissimum		Corynebacterium afermentans		Kocuria rhizophila		Ottowia sp. HMT 894
Corynebacterium minutissimum		Micrococcus luteus		Staphylococcus capitis		Dermabacter hominis		Lawsonella clevelandensis		Treponema putidum
Staphylococcus capitis		Moraxella nonliquefaciens		Corynebacterium tuberculostearicum		Peptoniphilus harei		Corynebacterium minutissimum		Oribacterium parvum
Acinetobacter lwoffii		Staphylococcus hominis		Aerococcus viridans		Serratia marcescens		Staphylococcus capitis		Actinomyces radicidentis
Janibacter indicus		Cutibacterium granulosum		Janibacter indicus		Dietzia cinnamea		Corynebacterium tuberculostearicum		Gemella sp. HMT 928
Corynebacterium afermentans		Brochothrix thermosphacta		Corynebacterium afermentans		Staphylococcus haemolyticus		Aerococcus viridans		Corynebacterium tuscaniense
Dermabacter hominis		Corynebacterium coyleae		Dermabacter hominis		Acidovorax temperans		Janibacter indicus		Desulfovibrio fairfieldensis
Serratia marcescens		Roseomonas gilardii		Serratia marcescens		Roseomonas mucosa		Corynebacterium afermentans		Desulfomicrobium orale
Dietzia cinnamea		Staphylococcus lugdunensis		Dietzia cinnamea		Staphylococcus pettenkoferi		Dermabacter hominis		Cutibacterium sp. HMT 193
Streptococcus thermophilus		Corynebacterium amycolatum		Staphylococcus haemolyticus		Micrococcus luteus		Serratia marcescens		Lentilactobacillus rapi
Roseomonas mucosa		Corynebacterium pseudodiphtheriticum		Acidovorax temperans		Moraxella nonliquefaciens		Dietzia cinnamea		Corynebacterium singulare
Staphylococcus pettenkoferi		Staphylococcus schleiferi		Roseomonas mucosa		Staphylococcus hominis		Staphylococcus haemolyticus		Klebsiella aerogenes
Micrococcus luteus		Corynebacterium appendicis		Staphylococcus pettenkoferi		Cutibacterium granulosum		Roseomonas mucosa		Micavibrio aeruginosavorus
Moraxella nonliquefaciens		Acinetobacter johnsonii		Micrococcus luteus		Brochothrix thermosphacta		Staphylococcus pettenkoferi		Staphylococcus pasteuri
Staphylococcus hominis		Lachnoanaerobaculum sp. HMT 083		Moraxella nonliquefaciens		Corynebacterium coyleae		Micrococcus luteus		Corynebacterium gottingense
Brochothrix thermosphacta		Haemophilus paraphrohaemolyticus		Staphylococcus hominis		Roseomonas gilardii		Moraxella nonliquefaciens		Lactobacillus ultunensis
Corynebacterium coyleae		Selenomonas sp. HMT 920		Cutibacterium granulosum		Staphylococcus lugdunensis		Staphylococcus hominis		Dialister pneumosintes
Roseomonas gilardii		Leptotrichia sp. HMT 498		Brochothrix thermosphacta		Corynebacterium amycolatum		Cutibacterium granulosum		Arthrospira platensis
Staphylococcus lugdunensis		Corynebacterium accolens		Corynebacterium coyleae		Corynebacterium pseudodiphtheriticum		Brochothrix thermosphacta		Mogibacterium pumilum
Corynebacterium pseudodiphtheriticum		Peptoniphilus sp. HMT 187		Roseomonas gilardii		Staphylococcus schleiferi		Corynebacterium coyleae		Corynebacterium striatum
Staphylococcus schleiferi		Corynebacterium pilbarense		Staphylococcus lugdunensis		Corynebacterium appendicis		Roseomonas gilardii		Staphylococcus cohnii
Corynebacterium appendicis		Corynebacterium jeikeium		Corynebacterium amycolatum		Acinetobacter johnsonii		Staphylococcus lugdunensis		Corynebacterium kroppenstedtii
Lachnoanaerobaculum sp. HMT 083		Bacteroides zoogleoformans		Corynebacterium pseudodiphtheriticum		Lachnoanaerobaculum sp. HMT 083		Corynebacterium amycolatum		Acinetobacter radioresistens
Haemophilus paraphrohaemolyticus		Peptostreptococcaceae [G-6] [Eubacterium] minutum		Staphylococcus schleiferi		Haemophilus paraphrohaemolyticus		Corynebacterium pseudodiphtheriticum		Moraxella lincolnii
Peptoniphilus sp. HMT 187		Mogibacterium diversum		Corynebacterium appendicis		Leptotrichia sp. HMT 498		Staphylococcus schleiferi		Acinetobacter junii
Corynebacterium pilbarense		Fastidiosipila sanguinis		Acinetobacter johnsonii		Corynebacterium accolens		Corynebacterium appendicis		Lawsonella clevelandensis
Corynebacterium jeikeium		Prevotella sp. HMT 376		Haemophilus paraphrohaemolyticus		Peptoniphilus sp. HMT 187		Lachnoanaerobaculum sp. HMT 083		Corynebacterium minutissimum
Bacteroides zoogleoformans		Bacteroides heparinolyticus		Leptotrichia sp. HMT 498		Corynebacterium pilbarense		Haemophilus paraphrohaemolyticus		Corynebacterium tuberculostearicum
Peptostreptococcaceae [G-6] [Eubacterium] minutum		Lachnospiraceae [G-2] bacterium HMT 096		Corynebacterium accolens		Corynebacterium jeikeium		Leptotrichia sp. HMT 498		Aerococcus viridans
Mogibacterium diversum		Selenomonas sp. HMT 136		Peptoniphilus sp. HMT 187		Bacteroides zoogleoformans		Corynebacterium accolens		Acinetobacter lwoffii
Fastidiosipila sanguinis		Actinomyces sp. HMT 897		Corynebacterium pilbarense		Peptostreptococcaceae [G-6] [Eubacterium] minutum		Corynebacterium aurimucosum		Serratia marcescens
Bacteroides heparinolyticus		Lachnospiraceae [G-8] bacterium HMT 500		Corynebacterium jeikeium		Mogibacterium diversum		Peptoniphilus sp. HMT 187		Staphylococcus haemolyticus
Capnocytophaga sp. HMT 878		Peptoniphilaceae [G-3] bacterium HMT 929		Peptostreptococcaceae [G-6] [Eubacterium] minutum		Fastidiosipila sanguinis		Corynebacterium pilbarense		Staphylococcus pettenkoferi
Actinomyces sp. HMT 897		Prevotella sp. HMT 820		Mogibacterium diversum		Bacteroides heparinolyticus		Corynebacterium jeikeium		Moraxella nonliquefaciens
Lachnospiraceae [G-8] bacterium HMT 500		Acidovorax caeni		Fastidiosipila sanguinis		Lachnospiraceae [G-2] bacterium HMT 096		Peptostreptococcaceae [G-6] [Eubacterium] minutum		Staphylococcus hominis
Peptoniphilaceae [G-3] bacterium HMT 929		Prevotella sp. HMT 314		Bacteroides heparinolyticus		Actinomyces sp. HMT 897		Mogibacterium diversum		Cutibacterium granulosum
Prevotella sp. HMT 820		Pseudomonas luteola		Actinomyces sp. HMT 897		Peptoniphilaceae [G-3] bacterium HMT 929		Fastidiosipila sanguinis		Brochothrix thermosphacta
Pseudomonas luteola		Sphingomonas glacialis		Peptoniphilaceae [G-3] bacterium HMT 929		Acidovorax caeni		Bacteroides heparinolyticus		Corynebacterium coyleae
Sphingomonas glacialis		Erythrobacter tepidarius		Acidovorax caeni		Prevotella sp. HMT 314		Actinomyces sp. HMT 897		Roseomonas gilardii
Erythrobacter tepidarius		Corynebacterium propinquum		Pseudomonas luteola		Pseudomonas luteola		Lachnospiraceae [G-8] bacterium HMT 500		Staphylococcus lugdunensis
Corynebacterium propinquum		Corynebacterium bovis		Sphingomonas glacialis		Sphingomonas glacialis		Peptoniphilaceae [G-3] bacterium HMT 929		Corynebacterium pseudodiphtheriticum
Corynebacterium bovis		Corynebacterium mastitidis		Erythrobacter tepidarius		Erythrobacter tepidarius		Pseudomonas luteola		Staphylococcus schleiferi
Corynebacterium mastitidis		Staphylococcus auricularis		Corynebacterium propinquum		Corynebacterium propinquum		Sphingomonas glacialis		Corynebacterium appendicis
Staphylococcus auricularis		Corynebacterium massiliense		Corynebacterium bovis		Corynebacterium bovis		Erythrobacter tepidarius		Acinetobacter johnsonii
Corynebacterium massiliense		Novosphingobium panipatense		Corynebacterium mastitidis		Corynebacterium mastitidis		Corynebacterium propinquum		Lachnoanaerobaculum sp. HMT 083
Novosphingobium panipatense		Campylobacter sputorum		Staphylococcus auricularis		Staphylococcus auricularis		Corynebacterium bovis		Corynebacterium pilbarense
Campylobacter sputorum		Saccharibacteria (TM7) [G-1] bacterium HMT 488		Corynebacterium massiliense		Corynebacterium massiliense		Corynebacterium mastitidis		Corynebacterium jeikeium
Saccharibacteria (TM7) [G-1] bacterium HMT 488		Saccharibacteria (TM7) [G-8] bacterium HMT 955		Novosphingobium panipatense		Novosphingobium panipatense		Staphylococcus auricularis		Peptostreptococcaceae [G-6] [Eubacterium] minutum
Saccharibacteria (TM7) [G-8] bacterium HMT 955		Saccharibacteria (TM7) [G-1] bacterium HMT 957		Campylobacter sputorum		Campylobacter sputorum		Corynebacterium massiliense		Mogibacterium diversum
Saccharibacteria (TM7) [G-1] bacterium HMT 957		Tannerella sp._HMT_808		Saccharibacteria (TM7) [G-8] bacterium HMT 955		Saccharibacteria (TM7) [G-1] bacterium HMT 488		Novosphingobium panipatense		Fastidiosipila sanguinis
Tannerella sp._HMT_808		Absconditabacteria (SR1) [G-1] bacterium HMT 991		Saccharibacteria (TM7) [G-1] bacterium HMT 957		Tannerella sp._HMT_808		Campylobacter sputorum		Peptoniphilaceae [G-3] bacterium HMT 929
Absconditabacteria (SR1) [G-1] bacterium HMT 991		Actinomyces oricola		Tannerella sp._HMT_808		Actinomyces oricola		Saccharibacteria (TM7) [G-8] bacterium HMT 955		Pseudomonas luteola
Actinomyces oricola		Anaerococcus octavius		Absconditabacteria (SR1) [G-1] bacterium HMT 991		Anaerococcus octavius		Absconditabacteria (SR1) [G-1] bacterium HMT 991		Sphingomonas glacialis
Anaerococcus octavius		Bosea vestrisii		Actinomyces oricola		Bosea vestrisii		Actinomyces oricola		Corynebacterium propinquum
Bosea vestrisii		Corynebacterium macginleyi		Anaerococcus octavius		Corynebacterium macginleyi		Anaerococcus octavius		Corynebacterium mastitidis
Corynebacterium macginleyi		Corynebacterium mucifaciens		Bosea vestrisii		Corynebacterium mucifaciens		Bosea vestrisii		Staphylococcus auricularis
Corynebacterium mucifaciens		Erythrobacter ramosus		Corynebacterium macginleyi		Erythrobacter ramosus		Corynebacterium macginleyi		Corynebacterium massiliense
Erythrobacter ramosus		Fusobacterium naviforme		Corynebacterium mucifaciens		Fusobacterium naviforme		Corynebacterium mucifaciens		Novosphingobium panipatense
Fusobacterium naviforme		Peptoniphilus asaccharolyticus		Erythrobacter ramosus		Peptoniphilus asaccharolyticus		Erythrobacter ramosus		Campylobacter sputorum
Peptoniphilus asaccharolyticus		Schlegelella thermodepolymerans		Fusobacterium naviforme		Segetibacter aerophilus		Fusobacterium naviforme		Actinomyces oricola
Segetibacter aerophilus		Segetibacter aerophilus		Peptoniphilus asaccharolyticus		Treponema pectinovorum		Peptoniphilus asaccharolyticus		Anaerococcus octavius
Treponema pectinovorum		Treponema pectinovorum		Schlegelella thermodepolymerans		Brevibacterium paucivorans		Schlegelella thermodepolymerans		Bosea vestrisii
Brevibacterium paucivorans		Leptotrichia hongkongensis		Treponema pectinovorum		Oribacterium sp. HMT 102		Segetibacter aerophilus		Corynebacterium macginleyi
Oribacterium sp. HMT 102		Brevibacterium paucivorans		Leptotrichia hongkongensis		Leptotrichia sp. HMT 223		Treponema pectinovorum		Corynebacterium mucifaciens
Peptostreptococcaceae [G-7] bacterium HMT 081		Oribacterium sp. HMT 102		Brevibacterium paucivorans		Leptotrichia sp. HMT 417		Leptotrichia hongkongensis		Erythrobacter ramosus
Fusobacterium sp. HMT 248		Leptotrichia sp. HMT 417		Oribacterium sp. HMT 102		Victivallales [G-1] bacterium HMT 998		Brevibacterium paucivorans		Fusobacterium naviforme
Victivallales [G-1] bacterium HMT 998		Peptostreptococcaceae [G-7] bacterium HMT 081		Fusobacterium sp. HMT 248		Saccharibacteria_(TM7)_[G-1] bacterium_HMT_349		Oribacterium sp. HMT 102		Peptoniphilus asaccharolyticus
Porphyromonas sp. HMT 275		Victivallales [G-1] bacterium HMT 998		Victivallales [G-1] bacterium HMT 998		Porphyromonas sp. HMT 275		Leptotrichia sp. HMT 223		Segetibacter aerophilus
Prevotella sp. HMT 475		Saccharibacteria_(TM7)_[G-1] bacterium_HMT_349		Saccharibacteria_(TM7)_[G-1] bacterium_HMT_349		Leptotrichia sp. HMT 218		Victivallales [G-1] bacterium HMT 998		Leptotrichia hongkongensis
Leptotrichia sp. HMT 218		Pseudoleptotrichia sp. HMT 221		Prevotella sp. HMT 475		Pseudoleptotrichia sp. HMT 221		Saccharibacteria_(TM7)_[G-1] bacterium_HMT_349		Brevibacterium paucivorans
Pseudoleptotrichia sp. HMT 221		Cellulosimicrobium cellulans		Cellulosimicrobium cellulans		Cellulosimicrobium cellulans		Porphyromonas sp. HMT 275		Leptotrichia sp. HMT 223
Cellulosimicrobium cellulans		Fannyhessea sp. HMT 416		Fannyhessea sp. HMT 416		Fannyhessea sp. HMT 416		Cellulosimicrobium cellulans		Victivallales [G-1] bacterium HMT 998
Fannyhessea sp. HMT 416		Arachnia rubra		Arachnia rubra		Arachnia rubra		Fannyhessea sp. HMT 416		Fannyhessea sp. HMT 416
Arachnia rubra		Lachnospiraceae_[G-2] bacterium_HMT_096				Lachnospiraceae_[G-2] bacterium_HMT_096		Arachnia rubra		Arachnia rubra
