# Supplementary material for: Community dynamics during de novo colonization of the nascent peri-implant sulcus
Source: Int J Oral Sci. 2025 Apr 29;17:37. doi: 10.1038/s41368-025-00367-7 (PMC12041454; doi:10.1038/s41368-025-00367-7)
Supplement: Supplementary file 9 — Supplementary Table 4. Data supporting Figure 5 - Microbiome core, 100% [file 41368_2025_367_MOESM9_ESM.xlsx]

## Sheet: homd_microbiome_core100f
Supplementary Table 3. Figure 4 E - Microbiome core, 100%.
Uncovery	24 Hours	1 Week	3 Weeks	6 Weeks	12 Weeks
Abiotrophia defectiva	Abiotrophia defectiva	Abiotrophia defectiva	Absconditabacteria (SR1) [G-1] bacterium HMT 991	Actinomyces dentalis	Abiotrophia defectiva
Absconditabacteria (SR1) [G-1] bacterium HMT 874	Absconditabacteria (SR1) [G-1] bacterium HMT 991	Achromobacter xylosoxidans	Acinetobacter baumannii	Actinomyces gerencseriae	Achromobacter xylosoxidans
Acinetobacter baumannii	Acinetobacter baumannii	Acinetobacter johnsonii	Acinetobacter johnsonii	Actinomyces israelii	Acinetobacter baumannii
Acinetobacter lwoffii	Acinetobacter johnsonii	Actinomyces dentalis	Acinetobacter radioresistens	Actinomyces johnsonii	Acinetobacter johnsonii
Actinomyces dentalis	Acinetobacter radioresistens	Actinomyces graevenitzii	Actinomyces dentalis	Actinomyces massiliensis	Actinomyces dentalis
Actinomyces oris	Actinomyces dentalis	Actinomyces johnsonii	Actinomyces israelii	Actinomyces naeslundii	Actinomyces gerencseriae
Actinomyces sp. HMT 169	Actinomyces gerencseriae	Actinomyces naeslundii	Actinomyces johnsonii	Actinomyces oricola	Actinomyces graevenitzii
Actinomyces sp. HMT 171	Actinomyces israelii	Actinomyces sp. HMT 169	Actinomyces massiliensis	Actinomyces oris	Actinomyces israelii
Actinomyces sp. HMT 175	Actinomyces massiliensis	Actinomyces sp. HMT 175	Actinomyces naeslundii	Actinomyces radicidentis	Actinomyces johnsonii
Actinomyces viscosus	Actinomyces naeslundii	Actinomyces sp. HMT 414	Actinomyces oricola	Actinomyces sp. HMT 169	Actinomyces massiliensis
Aggregatibacter actinomycetemcomitans	Actinomyces oris	Actinomyces sp. HMT 448	Actinomyces oris	Actinomyces sp. HMT 170	Actinomyces naeslundii
Aggregatibacter aphrophilus	Actinomyces sp. HMT 169	Aggregatibacter actinomycetemcomitans	Actinomyces radicidentis	Actinomyces sp. HMT 171	Actinomyces oricola
Alloprevotella tannerae	Actinomyces sp. HMT 171	Aggregatibacter aphrophilus	Actinomyces sp. HMT 169	Actinomyces sp. HMT 175	Actinomyces oris
Anaerococcus lactolyticus	Actinomyces sp. HMT 175	Aggregatibacter paraphrophilus	Actinomyces sp. HMT 170	Actinomyces sp. HMT 414	Actinomyces radicidentis
Anaerococcus octavius	Actinomyces sp. HMT 897	Aggregatibacter segnis	Actinomyces sp. HMT 171	Actinomyces viscosus	Actinomyces sp. HMT 169
Anaerococcus prevotii	Actinomyces viscosus	Aggregatibacter sp. HMT 458	Actinomyces sp. HMT 175	Aerococcus viridans	Actinomyces sp. HMT 170
Atopobium minutum	Aerococcus viridans	Aggregatibacter sp. HMT 513	Actinomyces sp. HMT 414	Aggregatibacter actinomycetemcomitans	Actinomyces sp. HMT 171
Bacillus anthracis	Aggregatibacter actinomycetemcomitans	Alloiococcus otitis	Actinomyces sp. HMT 448	Aggregatibacter aphrophilus	Actinomyces sp. HMT 175
Bacillus subtilis	Aggregatibacter aphrophilus	Alloprevotella rava	Actinomyces sp. HMT 897	Aggregatibacter sp. HMT 513	Actinomyces sp. HMT 414
Bacteroides pyogenes	Aggregatibacter paraphrophilus	Alloprevotella tannerae	Actinomyces viscosus	Alloprevotella rava	Actinomyces sp. HMT 448
Bacteroides zoogleoformans	Aggregatibacter segnis	Anaerococcus lactolyticus	Aerococcus viridans	Alloprevotella tannerae	Actinomyces sp. HMT 897
Campylobacter concisus	Aggregatibacter sp. HMT 458	Anaerococcus octavius	Aggregatibacter actinomycetemcomitans	Anaerococcus lactolyticus	Actinomyces timonensis
Campylobacter rectus	Aggregatibacter sp. HMT 513	Bacteroides heparinolyticus	Aggregatibacter aphrophilus	Anaerococcus tetradius	Actinomyces viscosus
Campylobacter showae	Alloprevotella tannerae	Bacteroides pyogenes	Aggregatibacter paraphrophilus	Anaeroglobus geminatus	Aerococcus viridans
Campylobacter ureolyticus	Anaerococcus lactolyticus	Brochothrix thermosphacta	Aggregatibacter sp. HMT 513	Bacteroides heparinolyticus	Aggregatibacter actinomycetemcomitans
Capnocytophaga endodontalis	Anaerococcus octavius	Campylobacter concisus	Alkalihalobacillus clausii	Bacteroides pyogenes	Aggregatibacter paraphrophilus
Capnocytophaga gingivalis	Anaerococcus prevotii	Campylobacter rectus	Alloprevotella rava	Bacteroides zoogleoformans	Aggregatibacter sp. HMT 458
Capnocytophaga granulosa	Anaerococcus tetradius	Campylobacter showae	Alloprevotella tannerae	Bifidobacterium animalis	Alloprevotella rava
Capnocytophaga leadbetteri	Anaeroglobus geminatus	Capnocytophaga endodontalis	Anaerococcus octavius	Brevundimonas diminuta	Alloprevotella tannerae
Capnocytophaga ochracea	Bacteroides pyogenes	Capnocytophaga gingivalis	Bacteroidales [G-2] bacterium HMT 274	Bulleidia extructa	Alloscardovia omnicolens
Capnocytophaga sp. HMT 323	Bulleidia extructa	Capnocytophaga granulosa	Bacteroides zoogleoformans	Campylobacter concisus	Anaerococcus tetradius
Capnocytophaga sp. HMT 324	Campylobacter concisus	Capnocytophaga sp. HMT 323	Bulleidia extructa	Campylobacter curvus	Bacteroidales [G-2] bacterium HMT 274
Capnocytophaga sp. HMT 335	Campylobacter sputorum	Capnocytophaga sp. HMT 335	Campylobacter concisus	Campylobacter gracilis	Bacteroides heparinolyticus
Capnocytophaga sp. HMT 336	Campylobacter ureolyticus	Capnocytophaga sp. HMT 336	Campylobacter curvus	Campylobacter rectus	Bacteroides pyogenes
Capnocytophaga sp. HMT 338	Capnocytophaga gingivalis	Capnocytophaga sp. HMT 338	Campylobacter gracilis	Campylobacter showae	Bacteroides zoogleoformans
Capnocytophaga sp. HMT 380	Capnocytophaga granulosa	Capnocytophaga sp. HMT 380	Campylobacter rectus	Campylobacter ureolyticus	Bartonella schoenbuchensis
Capnocytophaga sp. HMT 412	Capnocytophaga leadbetteri	Capnocytophaga sp. HMT 412	Campylobacter showae	Capnocytophaga endodontalis	Bulleidia extructa
Capnocytophaga sp. HMT 863	Capnocytophaga ochracea	Capnocytophaga sp. HMT 863	Campylobacter ureolyticus	Capnocytophaga gingivalis	Campylobacter concisus
Capnocytophaga sp. HMT 864	Capnocytophaga sp. HMT 323	Capnocytophaga sp. HMT 878	Capnocytophaga endodontalis	Capnocytophaga granulosa	Campylobacter curvus
Capnocytophaga sp. HMT 878	Capnocytophaga sp. HMT 324	Capnocytophaga sp. HMT 902	Capnocytophaga gingivalis	Capnocytophaga ochracea	Campylobacter gracilis
Capnocytophaga sp. HMT 902	Capnocytophaga sp. HMT 335	Capnocytophaga sputigena	Capnocytophaga granulosa	Capnocytophaga sp. HMT 323	Campylobacter rectus
Capnocytophaga sp. HMT 903	Capnocytophaga sp. HMT 336	Corynebacterium aurimucosum	Capnocytophaga haemolytica	Capnocytophaga sp. HMT 335	Campylobacter showae
Capnocytophaga sputigena	Capnocytophaga sp. HMT 380	Corynebacterium matruchotii	Capnocytophaga leadbetteri	Capnocytophaga sp. HMT 336	Campylobacter sputorum
Clostridiales [F-3][G-1] bacterium HMT 876	Capnocytophaga sp. HMT 878	Corynebacterium simulans	Capnocytophaga ochracea	Capnocytophaga sp. HMT 863	Campylobacter ureolyticus
Corynebacterium aurimucosum	Capnocytophaga sp. HMT 902	Cutibacterium acnes	Capnocytophaga sp. HMT 323	Capnocytophaga sp. HMT 878	Capnocytophaga endodontalis
Corynebacterium matruchotii	Catonella morbi	Delftia acidovorans	Capnocytophaga sp. HMT 324	Capnocytophaga sp. HMT 902	Capnocytophaga gingivalis
Corynebacterium simulans	Clostridiales [F-3][G-1] bacterium HMT 876	Desulfovibrio fairfieldensis	Capnocytophaga sp. HMT 332	Capnocytophaga sputigena	Capnocytophaga granulosa
Desulfovibrio fairfieldensis	Comamonas testosteroni	Dialister invisus	Capnocytophaga sp. HMT 335	Centipeda periodontii	Capnocytophaga leadbetteri
Dialister invisus	Corynebacterium aurimucosum	Dialister micraerophilus	Capnocytophaga sp. HMT 336	Corynebacterium aurimucosum	Capnocytophaga ochracea
Dialister micraerophilus	Corynebacterium durum	Eikenella corrodens	Capnocytophaga sp. HMT 338	Corynebacterium matruchotii	Capnocytophaga sp. HMT 323
Dialister pneumosintes	Corynebacterium matruchotii	Enterobacter cancerogenus	Capnocytophaga sp. HMT 380	Corynebacterium simulans	Capnocytophaga sp. HMT 324
Eggerthia catenaformis	Corynebacterium simulans	Enterococcus durans	Capnocytophaga sp. HMT 412	Cutibacterium acnes	Capnocytophaga sp. HMT 335
Eikenella corrodens	Cutibacterium acnes	Enterococcus faecalis	Capnocytophaga sp. HMT 863	Delftia acidovorans	Capnocytophaga sp. HMT 336
Enterococcus casseliflavus	Desulfovibrio fairfieldensis	Enterococcus italicus	Capnocytophaga sp. HMT 864	Desulfovibrio fairfieldensis	Capnocytophaga sp. HMT 338
Enterococcus durans	Dialister invisus	Enterococcus saccharolyticus	Capnocytophaga sp. HMT 878	Dialister invisus	Capnocytophaga sp. HMT 380
Escherichia coli	Dialister micraerophilus	Erysipelothrix tonsillarum	Capnocytophaga sp. HMT 902	Dialister micraerophilus	Capnocytophaga sp. HMT 412
Fannyhessea vaginae	Dialister pneumosintes	Escherichia coli	Capnocytophaga sp. HMT 903	Dolosigranulum pigrum	Capnocytophaga sp. HMT 863
Fastidiosipila sanguinis	Eggerthia catenaformis	Fannyhessea vaginae	Capnocytophaga sputigena	Eggerthia catenaformis	Capnocytophaga sp. HMT 864
Filifactor alocis	Eikenella corrodens	Finegoldia magna	Cardiobacterium hominis	Eikenella corrodens	Capnocytophaga sp. HMT 878
Finegoldia magna	Enhydrobacter aerosaccus	Fusobacterium gonidiaformans	Cardiobacterium valvarum	Enterococcus casseliflavus	Capnocytophaga sp. HMT 902
Fusobacterium gonidiaformans	Enterococcus casseliflavus	Fusobacterium hwasookii	Catonella morbi	Enterococcus durans	Capnocytophaga sp. HMT 903
Fusobacterium hwasookii	Enterococcus durans	Fusobacterium necrophorum	Corynebacterium aurimucosum	Enterococcus faecalis	Capnocytophaga sputigena
Fusobacterium necrophorum	Enterococcus faecalis	Fusobacterium nucleatum	Corynebacterium matruchotii	Enterococcus italicus	Cardiobacterium hominis
Fusobacterium nucleatum	Enterococcus saccharolyticus	Fusobacterium nucleatum subsp. animalis	Corynebacterium simulans	Escherichia coli	Cardiobacterium valvarum
Fusobacterium nucleatum subsp. animalis	Erysipelothrix tonsillarum	Fusobacterium nucleatum subsp. nucleatum	Cutibacterium acnes	Fannyhessea vaginae	Catonella morbi
Fusobacterium nucleatum subsp. polymorphum	Escherichia coli	Fusobacterium nucleatum subsp. polymorphum	Desulfovibrio fairfieldensis	Filifactor alocis	Centipeda periodontii
Fusobacterium nucleatum subsp. vincentii	Fannyhessea vaginae	Fusobacterium nucleatum subsp. vincentii	Dialister invisus	Finegoldia magna	Clostridiales [F-3][G-1] bacterium HMT 876
Fusobacterium periodonticum	Filifactor alocis	Fusobacterium sp. HMT 203	Dolosigranulum pigrum	Fusobacterium gonidiaformans	Corynebacterium aurimucosum
Fusobacterium sp. HMT 203	Finegoldia magna	Fusobacterium sp. HMT 248	Eggerthia catenaformis	Fusobacterium hwasookii	Corynebacterium durum
Fusobacterium sp. HMT 248	Fretibacterium fastidiosum	Gardnerella vaginalis	Eikenella corrodens	Fusobacterium nucleatum	Corynebacterium matruchotii
Fusobacterium sp. HMT 370	Fusobacterium gonidiaformans	Gemella bergeri	Enterococcus durans	Fusobacterium nucleatum subsp. animalis	Corynebacterium simulans
Gardnerella vaginalis	Fusobacterium hwasookii	Gemella haemolysans	Enterococcus italicus	Fusobacterium nucleatum subsp. nucleatum	Cutibacterium acnes
Gemella haemolysans	Fusobacterium necrophorum	Gemella morbillorum	Enterococcus saccharolyticus	Fusobacterium nucleatum subsp. polymorphum	Delftia acidovorans
Gemella sanguinis	Fusobacterium nucleatum	Gemella sanguinis	Escherichia coli	Fusobacterium nucleatum subsp. vincentii	Desulfovibrio fairfieldensis
Gemella sp. HMT 928	Fusobacterium nucleatum subsp. animalis	Gemella sp. HMT 928	Fannyhessea vaginae	Fusobacterium periodonticum	Dialister invisus
Gracilibacteria (GN02) [G-4] bacterium HMT 997	Fusobacterium nucleatum subsp. nucleatum	Granulicatella adiacens	Filifactor alocis	Fusobacterium sp. HMT 203	Dialister micraerophilus
Granulicatella adiacens	Fusobacterium nucleatum subsp. polymorphum	Granulicatella elegans	Finegoldia magna	Fusobacterium sp. HMT 248	Dolosigranulum pigrum
Granulicatella elegans	Fusobacterium nucleatum subsp. vincentii	Haemophilus ducreyi	Fusobacterium gonidiaformans	Fusobacterium sp. HMT 370	Eggerthia catenaformis
Haemophilus haemolyticus	Fusobacterium periodonticum	Haemophilus haemolyticus	Fusobacterium hwasookii	Gardnerella vaginalis	Eikenella corrodens
Haemophilus influenzae	Fusobacterium sp. HMT 203	Haemophilus influenzae	Fusobacterium necrophorum	Gemella haemolysans	Enhydrobacter aerosaccus
Haemophilus parainfluenzae	Fusobacterium sp. HMT 370	Haemophilus parahaemolyticus	Fusobacterium nucleatum	Gemella morbillorum	Enterococcus casseliflavus
Haemophilus sp. HMT 036	Gardnerella vaginalis	Haemophilus parainfluenzae	Fusobacterium nucleatum subsp. animalis	Gemella sanguinis	Enterococcus durans
Haemophilus sputorum	Gemella haemolysans	Haemophilus pittmaniae	Fusobacterium nucleatum subsp. nucleatum	Gemella sp. HMT 928	Enterococcus faecalis
Helicobacter pylori	Gemella morbillorum	Haemophilus sp. HMT 036	Fusobacterium nucleatum subsp. polymorphum	Granulicatella adiacens	Enterococcus saccharolyticus
Johnsonella ignava	Gemella sanguinis	Haemophilus sputorum	Fusobacterium nucleatum subsp. vincentii	Granulicatella elegans	Escherichia coli
Kingella denitrificans	Gemella sp. HMT 928	Johnsonella ignava	Fusobacterium periodonticum	Haemophilus ducreyi	Fannyhessea sp. HMT 416
Kingella kingae	Gracilibacteria (GN02) [G-4] bacterium HMT 997	Kingella denitrificans	Fusobacterium sp. HMT 203	Haemophilus haemolyticus	Fannyhessea vaginae
Kingella oralis	Granulicatella adiacens	Kingella kingae	Fusobacterium sp. HMT 248	Haemophilus influenzae	Filifactor alocis
Lachnoanaerobaculum saburreum	Granulicatella elegans	Kingella oralis	Fusobacterium sp. HMT 370	Haemophilus parainfluenzae	Finegoldia magna
Lachnoanaerobaculum umeaense	Haemophilus aegyptius	Lachnoanaerobaculum saburreum	Gardnerella vaginalis	Haemophilus paraphrohaemolyticus	Fusobacterium gonidiaformans
Lachnospiraceae [G-2] bacterium HMT 096	Haemophilus haemolyticus	Lachnoanaerobaculum sp. HMT 083	Gemella bergeri	Haemophilus pittmaniae	Fusobacterium hwasookii
Lachnospiraceae_[G-2] bacterium_HMT_096	Haemophilus influenzae	Lachnoanaerobaculum umeaense	Gemella haemolysans	Ignavibacterium album	Fusobacterium naviforme
Lacticaseibacillus rhamnosus	Haemophilus parainfluenzae	Lacticaseibacillus rhamnosus	Gemella morbillorum	Johnsonella ignava	Fusobacterium necrophorum
Lactobacillus crispatus	Haemophilus paraphrohaemolyticus	Lactobacillus acidophilus	Gemella sanguinis	Kingella denitrificans	Fusobacterium nucleatum
Lactobacillus gasseri	Haemophilus pittmaniae	Lactobacillus iners	Gemella sp. HMT 928	Kingella oralis	Fusobacterium nucleatum subsp. animalis
Lactobacillus jensenii	Haemophilus sp. HMT 036	Lactobacillus jensenii	Granulicatella adiacens	Lachnoanaerobaculum orale	Fusobacterium nucleatum subsp. nucleatum
Lactobacillus johnsonii	Haemophilus sputorum	Lactobacillus johnsonii	Haematobacter missouriensis	Lachnoanaerobaculum saburreum	Fusobacterium nucleatum subsp. polymorphum
Lactococcus lactis	Helicobacter pylori	Lactococcus lactis	Haemophilus haemolyticus	Lachnoanaerobaculum umeaense	Fusobacterium nucleatum subsp. vincentii
Lancefieldella parvula	Kingella denitrificans	Lancefieldella parvula	Haemophilus influenzae	Lachnospiraceae [G-2] bacterium HMT 096	Fusobacterium periodonticum
Lancefieldella rimae	Lachnoanaerobaculum orale	Lancefieldella rimae	Haemophilus parahaemolyticus	Lachnospiraceae_[G-2] bacterium_HMT_096	Fusobacterium sp. HMT 203
Lautropia mirabilis	Lachnoanaerobaculum saburreum	Leptotrichia hongkongensis	Haemophilus parainfluenzae	Lacticaseibacillus rhamnosus	Fusobacterium sp. HMT 248
Leptotrichia buccalis	Lachnoanaerobaculum sp. HMT 083	Leptotrichia shahii	Haemophilus sp. HMT 036	Lactobacillus iners	Fusobacterium sp. HMT 370
Leptotrichia hofstadii	Lachnoanaerobaculum umeaense	Leptotrichia sp. HMT 218	Johnsonella ignava	Lactobacillus jensenii	Gardnerella vaginalis
Leptotrichia hongkongensis	Lacticaseibacillus paracasei	Leptotrichia sp. HMT 223	Kingella denitrificans	Lactococcus lactis	Gemella bergeri
Leptotrichia shahii	Lacticaseibacillus rhamnosus	Leptotrichia sp. HMT 879	Kingella oralis	Lancefieldella parvula	Gemella haemolysans
Leptotrichia sp. HMT 212	Lactiplantibacillus plantarum	Leptotrichia wadei	Lachnoanaerobaculum orale	Leptotrichia hofstadii	Gemella morbillorum
Leptotrichia sp. HMT 215	Lactobacillus gasseri	Levilactobacillus brevis	Lachnoanaerobaculum saburreum	Leptotrichia hongkongensis	Gemella sanguinis
Leptotrichia sp. HMT 218	Lactobacillus iners	Ligilactobacillus salivarius	Lachnoanaerobaculum sp. HMT 083	Leptotrichia shahii	Gemella sp. HMT 928
Leptotrichia sp. HMT 223	Lactobacillus jensenii	Lysinibacillus fusiformis	Lachnoanaerobaculum umeaense	Leptotrichia sp. HMT 212	Gracilibacteria (GN02) [G-4] bacterium HMT 997
Leptotrichia sp. HMT 225	Lactobacillus johnsonii	Methanobrevibacter oralis	Lachnospiraceae [G-8] bacterium HMT 500	Leptotrichia sp. HMT 215	Granulicatella adiacens
Leptotrichia sp. HMT 417	Lactococcus lactis	Micrococcus luteus	Lacticaseibacillus rhamnosus	Leptotrichia sp. HMT 218	Granulicatella elegans
Leptotrichia sp. HMT 498	Lancefieldella rimae	Mobiluncus mulieris	Lactobacillus crispatus	Leptotrichia sp. HMT 223	Haemophilus ducreyi
Leptotrichia sp. HMT 879	Lancefieldella sp. HMT 199	Mogibacterium pumilum	Lactobacillus iners	Leptotrichia sp. HMT 417	Haemophilus haemolyticus
Leptotrichia wadei	Lautropia mirabilis	Mogibacterium timidum	Lactobacillus jensenii	Leptotrichia sp. HMT 498	Haemophilus influenzae
Ligilactobacillus salivarius	Leptotrichia buccalis	Moraxella catarrhalis	Lactobacillus johnsonii	Leptotrichia sp. HMT 879	Haemophilus parainfluenzae
Limosilactobacillus fermentum	Leptotrichia hofstadii	Moraxella nonliquefaciens	Lactococcus lactis	Leptotrichia wadei	Haemophilus pittmaniae
Limosilactobacillus panis	Leptotrichia hongkongensis	Mycoplasma genitalium	Lancefieldella parvula	Ligilactobacillus salivarius	Haemophilus sputorum
Methanobrevibacter oralis	Leptotrichia shahii	Neisseria cinerea	Lancefieldella rimae	Lysinibacillus fusiformis	Helicobacter pylori
Micrococcus luteus	Leptotrichia sp. HMT 212	Neisseria elongata	Lautropia mirabilis	Megasphaera micronuciformis	Johnsonella ignava
Mogibacterium timidum	Leptotrichia sp. HMT 215	Neisseria flavescens	Leptotrichia buccalis	Methanobrevibacter oralis	Kingella denitrificans
Moraxella catarrhalis	Leptotrichia sp. HMT 218	Neisseria gonorrhoeae	Leptotrichia hofstadii	Microbacterium flavescens	Kingella kingae
Mycoplasma hominis	Leptotrichia sp. HMT 223	Neisseria lactamica	Leptotrichia hongkongensis	Micrococcus luteus	Kingella oralis
Mycoplasma salivarium	Leptotrichia sp. HMT 417	Neisseria macacae	Leptotrichia shahii	Mogibacterium timidum	Kocuria rhizophila
Neisseria elongata	Leptotrichia sp. HMT 498	Neisseria meningitidis	Leptotrichia sp. HMT 212	Moraxella catarrhalis	Kytococcus sedentarius
Neisseria lactamica	Leptotrichia sp. HMT 847	Neisseria mucosa	Leptotrichia sp. HMT 215	Mycoplasma hominis	Lachnoanaerobaculum orale
Neisseria meningitidis	Leptotrichia sp. HMT 879	Neisseria oralis	Leptotrichia sp. HMT 218	Neisseria cinerea	Lachnoanaerobaculum saburreum
Neisseria mucosa	Leptotrichia wadei	Neisseria perflava	Leptotrichia sp. HMT 223	Neisseria elongata	Lachnoanaerobaculum sp. HMT 083
Neisseria oralis	Levilactobacillus brevis	Neisseria polysaccharea	Leptotrichia sp. HMT 225	Neisseria flavescens	Lachnoanaerobaculum umeaense
Neisseria perflava	Ligilactobacillus salivarius	Neisseria sicca	Leptotrichia sp. HMT 417	Neisseria gonorrhoeae	Lachnospiraceae [G-2] bacterium HMT 096
Neisseria polysaccharea	Limosilactobacillus coleohominis	Neisseria subflava	Leptotrichia sp. HMT 498	Neisseria lactamica	Lachnospiraceae [G-8] bacterium HMT 500
Neisseria sicca	Limosilactobacillus reuteri	Oribacterium asaccharolyticum	Leptotrichia sp. HMT 847	Neisseria macacae	Lachnospiraceae_[G-2] bacterium_HMT_096
Neisseria sp. HMT 020	Lysinibacillus fusiformis	Oribacterium parvum	Leptotrichia sp. HMT 879	Neisseria meningitidis	Lacticaseibacillus rhamnosus
Neisseria subflava	Methanobrevibacter oralis	Oribacterium sinus	Leptotrichia wadei	Neisseria mucosa	Lactobacillus iners
Oribacterium asaccharolyticum	Micrococcus luteus	Parvimonas micra	Ligilactobacillus salivarius	Neisseria oralis	Lactobacillus jensenii
Oribacterium parvum	Moraxella catarrhalis	Parvimonas sp. HMT 110	Limosilactobacillus coleohominis	Neisseria perflava	Lactobacillus johnsonii
Oribacterium sp. HMT 078	Moraxella osloensis	Parvimonas sp. HMT 393	Limosilactobacillus fermentum	Neisseria polysaccharea	Lactococcus lactis
Parvimonas micra	Mycoplasma hominis	Peptoniphilus harei	Limosilactobacillus panis	Neisseria sicca	Lancefieldella parvula
Parvimonas sp. HMT 110	Mycoplasma orale	Peptoniphilus lacrimalis	Limosilactobacillus reuteri	Neisseria sp. HMT 020	Lancefieldella rimae
Parvimonas sp. HMT 393	Mycoplasmopsis fermentans	Peptoniphilus sp. HMT 187	Listeria monocytogenes	Neisseria subflava	Lautropia mirabilis
Peptoniphilus asaccharolyticus	Neisseria cinerea	Peptoniphilus sp. HMT 375	Megasphaera micronuciformis	Oribacterium asaccharolyticum	Leptotrichia buccalis
Peptoniphilus harei	Neisseria elongata	Peptostreptococcaceae [G-1] [Eubacterium] infirmum	Methanobrevibacter oralis	Oribacterium sinus	Leptotrichia hofstadii
Peptoniphilus lacrimalis	Neisseria flavescens	Peptostreptococcaceae [G-1] [Eubacterium] sulci	Micrococcus luteus	Oribacterium sp. HMT 078	Leptotrichia hongkongensis
Peptoniphilus sp. HMT 187	Neisseria lactamica	Peptostreptococcaceae [G-7] bacterium HMT 081	Mogibacterium diversum	Parvimonas micra	Leptotrichia shahii
Peptoniphilus sp. HMT 375	Neisseria macacae	Peptostreptococcaceae [G-9] [Eubacterium] brachy	Mogibacterium timidum	Parvimonas sp. HMT 393	Leptotrichia sp. HMT 212
Peptoniphilus sp. HMT 386	Neisseria meningitidis	Peptostreptococcus anaerobius	Moraxella catarrhalis	Peptoniphilaceae [G-1] bacterium HMT 113	Leptotrichia sp. HMT 215
Peptostreptococcaceae [G-5] [Eubacterium] saphenum	Neisseria mucosa	Porphyromonas gingivalis	Neisseria bacilliformis	Peptoniphilus harei	Leptotrichia sp. HMT 218
Peptostreptococcaceae [G-7] bacterium HMT 081	Neisseria oralis	Porphyromonas sp. HMT 275	Neisseria elongata	Peptoniphilus lacrimalis	Leptotrichia sp. HMT 223
Peptostreptococcus anaerobius	Neisseria perflava	Porphyromonas sp. HMT 278	Neisseria flavescens	Peptoniphilus sp. HMT 375	Leptotrichia sp. HMT 225
Peptostreptococcus stomatis	Neisseria polysaccharea	Prevotella aurantiaca	Neisseria lactamica	Peptoniphilus sp. HMT 386	Leptotrichia sp. HMT 417
Phocaeicola abscessus	Neisseria sicca	Prevotella baroniae	Neisseria macacae	Peptostreptococcaceae [G-1] [Eubacterium] infirmum	Leptotrichia sp. HMT 498
Porphyromonas gingivalis	Neisseria subflava	Prevotella buccae	Neisseria meningitidis	Peptostreptococcaceae [G-6] [Eubacterium] nodatum	Leptotrichia sp. HMT 847
Porphyromonas sp. HMT 275	Oribacterium asaccharolyticum	Prevotella dentalis	Neisseria mucosa	Peptostreptococcaceae [G-7] [Eubacterium] yurii subsps. yurii &#38; margaretiae	Leptotrichia sp. HMT 879
Porphyromonas uenonis	Oribacterium parvum	Prevotella denticola	Neisseria oralis	Peptostreptococcaceae [G-7] bacterium HMT 081	Leptotrichia wadei
Prevotella bivia	Oribacterium sp. HMT 078	Prevotella enoeca	Neisseria perflava	Peptostreptococcaceae [G-9] [Eubacterium] brachy	Lysinibacillus fusiformis
Prevotella buccae	Parvimonas sp. HMT 110	Prevotella histicola	Neisseria polysaccharea	Peptostreptococcus anaerobius	Megasphaera micronuciformis
Prevotella dentalis	Parvimonas sp. HMT 393	Prevotella intermedia	Neisseria sicca	Phocaeicola abscessus	Methanobrevibacter oralis
Prevotella denticola	Peptoniphilus harei	Prevotella jejuni	Neisseria subflava	Porphyromonas asaccharolytica	Micrococcus luteus
Prevotella enoeca	Peptoniphilus indolicus	Prevotella maculosa	Olsenella sp. HMT 807	Porphyromonas endodontalis	Mogibacterium diversum
Prevotella intermedia	Peptoniphilus lacrimalis	Prevotella marshii	Oribacterium asaccharolyticum	Porphyromonas gingivalis	Mogibacterium pumilum
Prevotella jejuni	Peptoniphilus sp. HMT 187	Prevotella melaninogenica	Oribacterium parvum	Porphyromonas sp. HMT 275	Mogibacterium timidum
Prevotella maculosa	Peptoniphilus sp. HMT 375	Prevotella micans	Oribacterium sinus	Porphyromonas sp. HMT 278	Moraxella catarrhalis
Prevotella marshii	Peptostreptococcaceae [G-1] [Eubacterium] infirmum	Prevotella multiformis	Oribacterium sp. HMT 078	Prevotella aurantiaca	Moraxella osloensis
Prevotella melaninogenica	Peptostreptococcaceae [G-1] [Eubacterium] sulci	Prevotella multisaccharivorax	Parvimonas micra	Prevotella bivia	Neisseria bacilliformis
Prevotella micans	Peptostreptococcaceae [G-6] [Eubacterium] nodatum	Prevotella nanceiensis	Parvimonas sp. HMT 110	Prevotella buccae	Neisseria cinerea
Prevotella nanceiensis	Peptostreptococcaceae [G-7] bacterium HMT 081	Prevotella nigrescens	Parvimonas sp. HMT 393	Prevotella buccalis	Neisseria elongata
Prevotella nigrescens	Peptostreptococcus anaerobius	Prevotella oralis	Peptoniphilaceae [G-1] bacterium HMT 113	Prevotella denticola	Neisseria flavescens
Prevotella oralis	Peptostreptococcus stomatis	Prevotella oris	Peptoniphilus harei	Prevotella enoeca	Neisseria gonorrhoeae
Prevotella oris	Phocaeicola abscessus	Prevotella oulorum	Peptoniphilus lacrimalis	Prevotella fusca	Neisseria lactamica
Prevotella oulorum	Porphyromonas asaccharolytica	Prevotella pallens	Peptoniphilus sp. HMT 187	Prevotella histicola	Neisseria macacae
Prevotella pallens	Porphyromonas gingivalis	Prevotella pleuritidis	Peptoniphilus sp. HMT 375	Prevotella intermedia	Neisseria meningitidis
Prevotella pleuritidis	Porphyromonas pasteri	Prevotella saccharolytica	Peptostreptococcaceae [G-1] [Eubacterium] infirmum	Prevotella jejuni	Neisseria mucosa
Prevotella saccharolytica	Porphyromonas sp. HMT 275	Prevotella salivae	Peptostreptococcaceae [G-1] [Eubacterium] sulci	Prevotella maculosa	Neisseria oralis
Prevotella salivae	Porphyromonas sp. HMT 278	Prevotella scopos	Peptostreptococcaceae [G-6] [Eubacterium] nodatum	Prevotella marshii	Neisseria perflava
Prevotella shahii	Prevotella aurantiaca	Prevotella sp. HMT 317	Peptostreptococcaceae [G-7] bacterium HMT 081	Prevotella melaninogenica	Neisseria polysaccharea
Prevotella sp. HMT 306	Prevotella buccalis	Prevotella sp. HMT 376	Peptostreptococcaceae [G-9] [Eubacterium] brachy	Prevotella micans	Neisseria sicca
Prevotella sp. HMT 314	Prevotella dentalis	Prevotella sp. HMT 475	Peptostreptococcus anaerobius	Prevotella multiformis	Neisseria sp. HMT 020
Prevotella sp. HMT 317	Prevotella denticola	Prevotella veroralis	Peptostreptococcus stomatis	Prevotella nigrescens	Neisseria subflava
Prevotella sp. HMT 376	Prevotella enoeca	Proteus mirabilis	Phocaeicola abscessus	Prevotella oralis	Neisseria weaveri
Prevotella sp. HMT 472	Prevotella histicola	Pseudoleptotrichia sp. HMT 221	Porphyromonas asaccharolytica	Prevotella oris	Oribacterium asaccharolyticum
Prevotella sp. HMT 475	Prevotella intermedia	Pseudomonas oleovorans	Porphyromonas gingivalis	Prevotella oulorum	Oribacterium parvum
Prevotella veroralis	Prevotella jejuni	Rothia aeria	Porphyromonas sp. HMT 278	Prevotella pleuritidis	Oribacterium sinus
Pseudoleptotrichia goodfellowii	Prevotella maculosa	Rothia dentocariosa	Porphyromonas uenonis	Prevotella saccharolytica	Oribacterium sp. HMT 078
Pseudoleptotrichia sp. HMT 221	Prevotella marshii	Rothia mucilaginosa	Prevotella aurantiaca	Prevotella salivae	Ottowia sp. HMT 894
Roseomonas mucosa	Prevotella melaninogenica	Saccharibacteria (TM7) [G-1] bacterium HMT 348	Prevotella baroniae	Prevotella sp. HMT 314	Parvimonas micra
Rothia aeria	Prevotella micans	Saccharibacteria (TM7) [G-8] bacterium HMT 955	Prevotella bivia	Prevotella sp. HMT 317	Parvimonas sp. HMT 110
Rothia dentocariosa	Prevotella multiformis	Saccharibacteria_(TM7)_[G-1] bacterium_HMT_349	Prevotella buccae	Prevotella sp. HMT 376	Parvimonas sp. HMT 393
Rothia mucilaginosa	Prevotella nigrescens	Schaalia lingnae	Prevotella buccalis	Prevotella sp. HMT 475	Peptidiphaga gingivicola
Saccharibacteria (TM7) [G-1] bacterium HMT 348	Prevotella oralis	Schaalia odontolytica	Prevotella dentalis	Prevotella veroralis	Peptidiphaga sp. HMT 183
Saccharibacteria (TM7) [G-1] bacterium HMT 488	Prevotella oris	Schaalia sp. HMT 172	Prevotella denticola	Pseudoleptotrichia goodfellowii	Peptoniphilaceae [G-1] bacterium HMT 113
Saccharibacteria (TM7) [G-8] bacterium HMT 955	Prevotella oulorum	Schaalia sp. HMT 180	Prevotella enoeca	Pseudoleptotrichia sp. HMT 221	Peptoniphilus harei
Selenomonas artemidis	Prevotella pallens	Segetibacter aerophilus	Prevotella fusca	Pseudomonas oleovorans	Peptoniphilus lacrimalis
Selenomonas noxia	Prevotella pleuritidis	Selenomonas artemidis	Prevotella histicola	Pseudoramibacter alactolyticus	Peptoniphilus sp. HMT 187
Selenomonas sp. HMT 136	Prevotella saccharolytica	Selenomonas flueggei	Prevotella intermedia	Rothia aeria	Peptoniphilus sp. HMT 375
Selenomonas sp. HMT 137	Prevotella salivae	Selenomonas noxia	Prevotella jejuni	Rothia dentocariosa	Peptoniphilus sp. HMT 386
Selenomonas sp. HMT 149	Prevotella shahii	Selenomonas sp. HMT 136	Prevotella loescheii	Rothia mucilaginosa	Peptostreptococcaceae [G-1] [Eubacterium] infirmum
Selenomonas sp. HMT 478	Prevotella sp. HMT 306	Selenomonas sp. HMT 138	Prevotella maculosa	Saccharibacteria (TM7) [G-1] bacterium HMT 348	Peptostreptococcaceae [G-6] [Eubacterium] minutum
Selenomonas sputigena	Prevotella sp. HMT 314	Selenomonas sputigena	Prevotella marshii	Saccharibacteria (TM7) [G-1] bacterium HMT 952	Peptostreptococcaceae [G-6] [Eubacterium] nodatum
Simonsiella muelleri	Prevotella sp. HMT 317	Shuttleworthia satelles	Prevotella melaninogenica	Saccharibacteria (TM7) [G-8] bacterium HMT 955	Peptostreptococcaceae [G-7] [Eubacterium] yurii subsps. yurii &#38; margaretiae
Sneathia sanguinegens	Prevotella sp. HMT 376	Sneathia sanguinegens	Prevotella micans	Scardovia wiggsiae	Peptostreptococcaceae [G-7] bacterium HMT 081
Sneathia vaginalis	Prevotella sp. HMT 475	Sneathia vaginalis	Prevotella multisaccharivorax	Schaalia lingnae	Peptostreptococcaceae [G-9] [Eubacterium] brachy
Solobacterium moorei	Prevotella sp. HMT 820	Staphylococcus epidermidis	Prevotella nanceiensis	Schaalia sp. HMT 180	Peptostreptococcus anaerobius
Staphylococcus cohnii	Prevotella veroralis	Staphylococcus hominis	Prevotella nigrescens	Selenomonas artemidis	Peptostreptococcus stomatis
Staphylococcus epidermidis	Pseudoleptotrichia goodfellowii	Stomatobaculum longum	Prevotella oralis	Selenomonas noxia	Phocaeicola abscessus
Staphylococcus pettenkoferi	Pseudomonas fluorescens	Streptococcus agalactiae	Prevotella oris	Selenomonas sp. HMT 137	Porphyromonas asaccharolytica
Streptococcus agalactiae	Pseudomonas stutzeri	Streptococcus anginosus	Prevotella oulorum	Selenomonas sp. HMT 138	Porphyromonas catoniae
Streptococcus anginosus	Rothia aeria	Streptococcus australis	Prevotella pallens	Sneathia sanguinegens	Porphyromonas endodontalis
Streptococcus australis	Rothia dentocariosa	Streptococcus constellatus	Prevotella pleuritidis	Sneathia vaginalis	Porphyromonas gingivalis
Streptococcus constellatus	Rothia mucilaginosa	Streptococcus cristatus	Prevotella saccharolytica	Staphylococcus aureus	Porphyromonas pasteri
Streptococcus cristatus	Saccharibacteria (TM7) [G-1] bacterium HMT 348	Streptococcus gordonii	Prevotella salivae	Staphylococcus cohnii	Porphyromonas sp. HMT 275
Streptococcus gordonii	Saccharibacteria (TM7) [G-1] bacterium HMT 488	Streptococcus infantis	Prevotella scopos	Staphylococcus epidermidis	Porphyromonas sp. HMT 278
Streptococcus infantis	Saccharibacteria (TM7) [G-8] bacterium HMT 955	Streptococcus intermedius	Prevotella shahii	Staphylococcus haemolyticus	Porphyromonas uenonis
Streptococcus intermedius	Saccharibacteria_(TM7)_[G-1] bacterium_HMT_349	Streptococcus lactarius	Prevotella sp. HMT 306	Staphylococcus hominis	Prevotella aurantiaca
Streptococcus lactarius	Schaalia lingnae	Streptococcus mitis	Prevotella sp. HMT 314	Stomatobaculum longum	Prevotella baroniae
Streptococcus mitis	Schaalia meyeri	Streptococcus mutans	Prevotella sp. HMT 317	Streptococcus agalactiae	Prevotella bivia
Streptococcus mutans	Schaalia odontolytica	Streptococcus oralis	Prevotella sp. HMT 376	Streptococcus anginosus	Prevotella buccae
Streptococcus oralis	Schaalia sp. HMT 180	Streptococcus oralis subsp. oralis	Prevotella sp. HMT 475	Streptococcus constellatus	Prevotella buccalis
Streptococcus oralis subsp. oralis	Selenomonas artemidis	Streptococcus parasanguinis	Prevotella sp. HMT 820	Streptococcus cristatus	Prevotella dentalis
Streptococcus parasanguinis	Selenomonas flueggei	Streptococcus peroris	Prevotella veroralis	Streptococcus downei	Prevotella denticola
Streptococcus peroris	Selenomonas infelix	Streptococcus pneumoniae	Propionibacteriaceae [G-2] bacterium HMT 192	Streptococcus gordonii	Prevotella enoeca
Streptococcus pneumoniae	Selenomonas noxia	Streptococcus pyogenes	Pseudoleptotrichia goodfellowii	Streptococcus infantis	Prevotella fusca
Streptococcus pyogenes	Selenomonas sputigena	Streptococcus salivarius	Pseudoleptotrichia sp. HMT 221	Streptococcus intermedius	Prevotella histicola
Streptococcus salivarius	Shuttleworthia satelles	Streptococcus sanguinis	Pseudoramibacter alactolyticus	Streptococcus lactarius	Prevotella intermedia
Streptococcus sanguinis	Slackia exigua	Streptococcus sinensis	Rothia aeria	Streptococcus mitis	Prevotella jejuni
Streptococcus sinensis	Sneathia sanguinegens	Streptococcus sp. HMT 056	Rothia dentocariosa	Streptococcus mutans	Prevotella loescheii
Streptococcus sp. HMT 056	Sneathia vaginalis	Streptococcus sp. HMT 066	Rothia mucilaginosa	Streptococcus oralis	Prevotella maculosa
Streptococcus sp. HMT 066	Solobacterium moorei	Streptococcus sp._HMT_061	Saccharibacteria (TM7) [G-1] bacterium HMT 348	Streptococcus oralis subsp. oralis	Prevotella marshii
Streptococcus sp._HMT_061	Staphylococcus caprae	Streptococcus sp._HMT_064	Saccharibacteria (TM7) [G-1] bacterium HMT 488	Streptococcus parasanguinis	Prevotella melaninogenica
Streptococcus sp._HMT_064	Staphylococcus epidermidis	Streptococcus thermophilus	Saccharibacteria (TM7) [G-8] bacterium HMT 955	Streptococcus pneumoniae	Prevotella micans
Streptococcus thermophilus	Staphylococcus haemolyticus	Streptococcus vestibularis	Scardovia wiggsiae	Streptococcus pyogenes	Prevotella multiformis
Streptococcus vestibularis	Stenotrophomonas maltophilia	Tannerella sp. HMT 286	Schaalia georgiae	Streptococcus sanguinis	Prevotella multisaccharivorax
Tannerella forsythia	Stomatobaculum longum	Veillonella atypica	Schaalia lingnae	Streptococcus sinensis	Prevotella nanceiensis
Tannerella sp. HMT 286	Streptococcus agalactiae	Veillonella denticariosi	Schaalia meyeri	Streptococcus sp. HMT 056	Prevotella nigrescens
Tannerella sp._HMT_808	Streptococcus anginosus	Veillonella dispar	Schaalia odontolytica	Streptococcus sp. HMT 066	Prevotella oralis
Veillonella atypica	Streptococcus australis	Veillonella parvula	Schaalia sp. HMT 172	Streptococcus sp._HMT_061	Prevotella oris
Veillonella denticariosi	Streptococcus constellatus	Veillonella rogosae	Schaalia sp. HMT 178	Streptococcus sp._HMT_064	Prevotella oulorum
Veillonella dispar	Streptococcus cristatus	Veillonella sp. HMT 780	Schaalia sp. HMT 180	Streptococcus thermophilus	Prevotella pallens
Veillonella parvula	Streptococcus gordonii	Yersinia pestis	Schaalia sp. HMT 877	Streptococcus vestibularis	Prevotella pleuritidis
Veillonella rogosae	Streptococcus infantis		Selenomonas artemidis	Tannerella forsythia	Prevotella saccharolytica
Veillonella sp. HMT 780	Streptococcus intermedius		Selenomonas infelix	Tannerella sp. HMT 286	Prevotella salivae
Yersinia pestis	Streptococcus lactarius		Selenomonas sp. HMT 126	Tannerella sp._HMT_808	Prevotella scopos
	Streptococcus mitis		Selenomonas sp. HMT 136	Treponema denticola	Prevotella shahii
	Streptococcus mutans		Selenomonas sp. HMT 137	Treponema maltophilum	Prevotella sp. HMT 306
	Streptococcus oralis		Selenomonas sp. HMT 138	Treponema pectinovorum	Prevotella sp. HMT 314
	Streptococcus oralis subsp. oralis		Selenomonas sp. HMT 478	Veillonella atypica	Prevotella sp. HMT 317
	Streptococcus parasanguinis		Selenomonas sp. HMT 920	Veillonella denticariosi	Prevotella sp. HMT 376
	Streptococcus peroris		Shuttleworthia satelles	Veillonella dispar	Prevotella sp. HMT 472
	Streptococcus pneumoniae		Simonsiella muelleri	Veillonella parvula	Prevotella sp. HMT 475
	Streptococcus pyogenes		Sneathia sanguinegens	Veillonella rogosae	Prevotella sp. HMT 820
	Streptococcus salivarius		Sneathia vaginalis	Yersinia pestis	Prevotella veroralis
	Streptococcus sanguinis		Solobacterium moorei		Proteus mirabilis
	Streptococcus sinensis		Staphylococcus aureus		Pseudoleptotrichia goodfellowii
	Streptococcus sp. HMT 056		Stenotrophomonas maltophilia		Pseudoleptotrichia sp. HMT 221
	Streptococcus sp. HMT 066		Streptococcus agalactiae		Pseudomonas oleovorans
	Streptococcus sp._HMT_061		Streptococcus anginosus		Pseudomonas stutzeri
	Streptococcus sp._HMT_064		Streptococcus australis		Roseomonas mucosa
	Streptococcus thermophilus		Streptococcus constellatus		Rothia aeria
	Streptococcus vestibularis		Streptococcus cristatus		Rothia dentocariosa
	Tannerella forsythia		Streptococcus gordonii		Rothia mucilaginosa
	Tannerella sp. HMT 286		Streptococcus infantis		Saccharibacteria (TM7) [G-1] bacterium HMT 348
	Tannerella sp._HMT_808		Streptococcus intermedius		Saccharibacteria (TM7) [G-1] bacterium HMT 488
	Treponema medium		Streptococcus lactarius		Saccharibacteria (TM7) [G-1] bacterium HMT 952
	Treponema pectinovorum		Streptococcus mitis		Saccharibacteria (TM7) [G-8] bacterium HMT 955
	Treponema putidum		Streptococcus mutans		Saccharibacteria_(TM7)_[G-1] bacterium_HMT_349
	Treponema socranskii		Streptococcus oralis		Schaalia georgiae
	Veillonella atypica		Streptococcus oralis subsp. oralis		Schaalia lingnae
	Veillonella denticariosi		Streptococcus parasanguinis		Schaalia odontolytica
	Veillonella dispar		Streptococcus peroris		Schaalia sp. HMT 172
	Veillonella parvula		Streptococcus pneumoniae		Schaalia sp. HMT 178
	Veillonella rogosae		Streptococcus pyogenes		Schaalia sp. HMT 180
	Yersinia pestis		Streptococcus salivarius		Schaalia sp. HMT 877
			Streptococcus sanguinis		Selenomonas artemidis
			Streptococcus sinensis		Selenomonas infelix
			Streptococcus sobrinus		Selenomonas noxia
			Streptococcus sp. HMT 056		Selenomonas sp. HMT 126
			Streptococcus sp. HMT 066		Selenomonas sp. HMT 133
			Streptococcus sp._HMT_061		Selenomonas sp. HMT 136
			Streptococcus sp._HMT_064		Selenomonas sp. HMT 137
			Streptococcus thermophilus		Selenomonas sp. HMT 138
			Streptococcus vestibularis		Selenomonas sp. HMT 149
			Tannerella forsythia		Selenomonas sp. HMT 478
			Tannerella sp. HMT 286		Selenomonas sp. HMT 892
			Tannerella sp._HMT_808		Selenomonas sp. HMT 920
			Treponema denticola		Selenomonas sputigena
			Treponema pectinovorum		Shuttleworthia satelles
			Treponema putidum		Simonsiella muelleri
			Veillonella atypica		Sneathia sanguinegens
			Veillonella denticariosi		Sneathia vaginalis
			Veillonella dispar		Solobacterium moorei
			Veillonella parvula		Staphylococcus epidermidis
			Veillonella rogosae		Stomatobaculum longum
			Veillonella sp. HMT 780		Streptococcus agalactiae
			Yersinia pestis		Streptococcus anginosus
					Streptococcus australis
					Streptococcus constellatus
					Streptococcus cristatus
					Streptococcus gordonii
					Streptococcus infantis
					Streptococcus intermedius
					Streptococcus lactarius
					Streptococcus mitis
					Streptococcus mutans
					Streptococcus oralis
					Streptococcus oralis subsp. oralis
					Streptococcus parasanguinis
					Streptococcus peroris
					Streptococcus pneumoniae
					Streptococcus pyogenes
					Streptococcus salivarius
					Streptococcus sanguinis
					Streptococcus sinensis
					Streptococcus sobrinus
					Streptococcus sp. HMT 056
					Streptococcus sp. HMT 066
					Streptococcus sp._HMT_061
					Streptococcus sp._HMT_064
					Streptococcus thermophilus
					Streptococcus vestibularis
					Tannerella forsythia
					Tannerella sp. HMT 286
					Tannerella sp._HMT_808
					Treponema denticola
					Treponema medium
					Veillonella atypica
					Veillonella denticariosi
					Veillonella dispar
					Veillonella parvula
					Veillonella rogosae
					Veillonella sp. HMT 780
					Yersinia pestis
